# Supplementary material for: Variantscape: Using Large Language Models to Build a Comprehensive Landscape of Cancer Variants for Precision Oncology
Source: Research Square preprint supplement (doi:10.21203/rs.3.rs-6614711/v1), 2025-05-29
Supplement: Supplementary file 1 [file c7a9ac3c042bf6e2396aa598.docx]

Variantscape: Using Large Language Models to Build a Comprehensive Landscape of Cancer Variants

Supplementary material

*Marie Wosny1,2, Maximilian Boesch3,4, Tobias Peres3, Thibault Niederhauser1, Martin Früh3, Christian Rothermundt5, Janna Hastings1,2,6

1School of Medicine, University of St.Gallen (HSG), St Gallen, Switzerland

2Institute for Implementation Science in Health Care, University of Zurich (UZH), Zurich, Switzerland

3HOCH Health Ostschweiz, Kantonsspital St.Gallen, Universitäres Lehr- und Forschungsspital, Department of Medical Oncology and Hematology, St.Gallen, Switzerland

4HOCH Health Ostschweiz, Kantonsspital St.Gallen, Universitäres Lehr- und Forschungsspital, Lung Center, St.Gallen, Switzerland

5Department of Medical Oncology and Cancer Center, Luzerner Kantonsspital (LUKS), Lucerne, Switzerland

6Swiss Institute of Bioinformatics (SIB), Lausanne, Switzerland

*Corresponding author: mariejohanna.wosny@unisg.ch

Table of supplementary information

Supplementary information 1: Workflow of computational LLM-based variant extraction and analysis pipeline. 3

Supplementary information 2.: Performance evaluation of cancer type extraction. 3

Supplementary information 3: Performance evaluation of treatment extraction. 3

Supplementary information 4: Performance evaluation of large language model prompts for study design classification. 4

Supplementary information 5: Performance evaluation of large language model prompts for variant-treatment relationship classification. 4

Supplementary information 6: Temporal analysis of biomedical publications (2014-2024) from OpenAlex: yearly, monthly, and weekly trends. 6

Supplementary information 7: Distribution of the number of gene mentions per biomedical publication. 7

Supplementary information 8: Distribution of study design types across 199,726 articles classified by LLaMA-3.3-70b and the ‘General Classifier’. 7

Supplementary information 9: Distribution of the most frequently mentioned specific treatments identified in the 126,195 articles (40.87%) containing treatments of the total 308,748 publications screened. 8

Supplementary information 10: Top 20 most frequent mentions of variants of 16,508 articles containing variants extracted by LLaMA-3.3-70b. 8

Supplementary information 11: Variant-associated extraction of Oncomine genes. 9

Supplementary information 12: Progressive merging ad filtering of datasets from 307,748 detected articles with Oncomine gene mentions, to 7,524 (2.4%) of articles which contain all predefined conditions, including variants. 10

Supplementary information 13: Most mentioned treatment types in the final analysis dataset of 7,524 articles. 10

Supplementary information 14: Most mentioned cancer types in the final analysis dataset of 7,524 articles. 11

Supplementary information 15: Heatmap illustrating co-associations of variants and cancers. 12

Supplementary information 16: Heatmap illustrating co-associations of cancers and treatments. 13

Supplementary information 1: Workflow of computational LLM-based variant extraction and analysis pipeline.

*
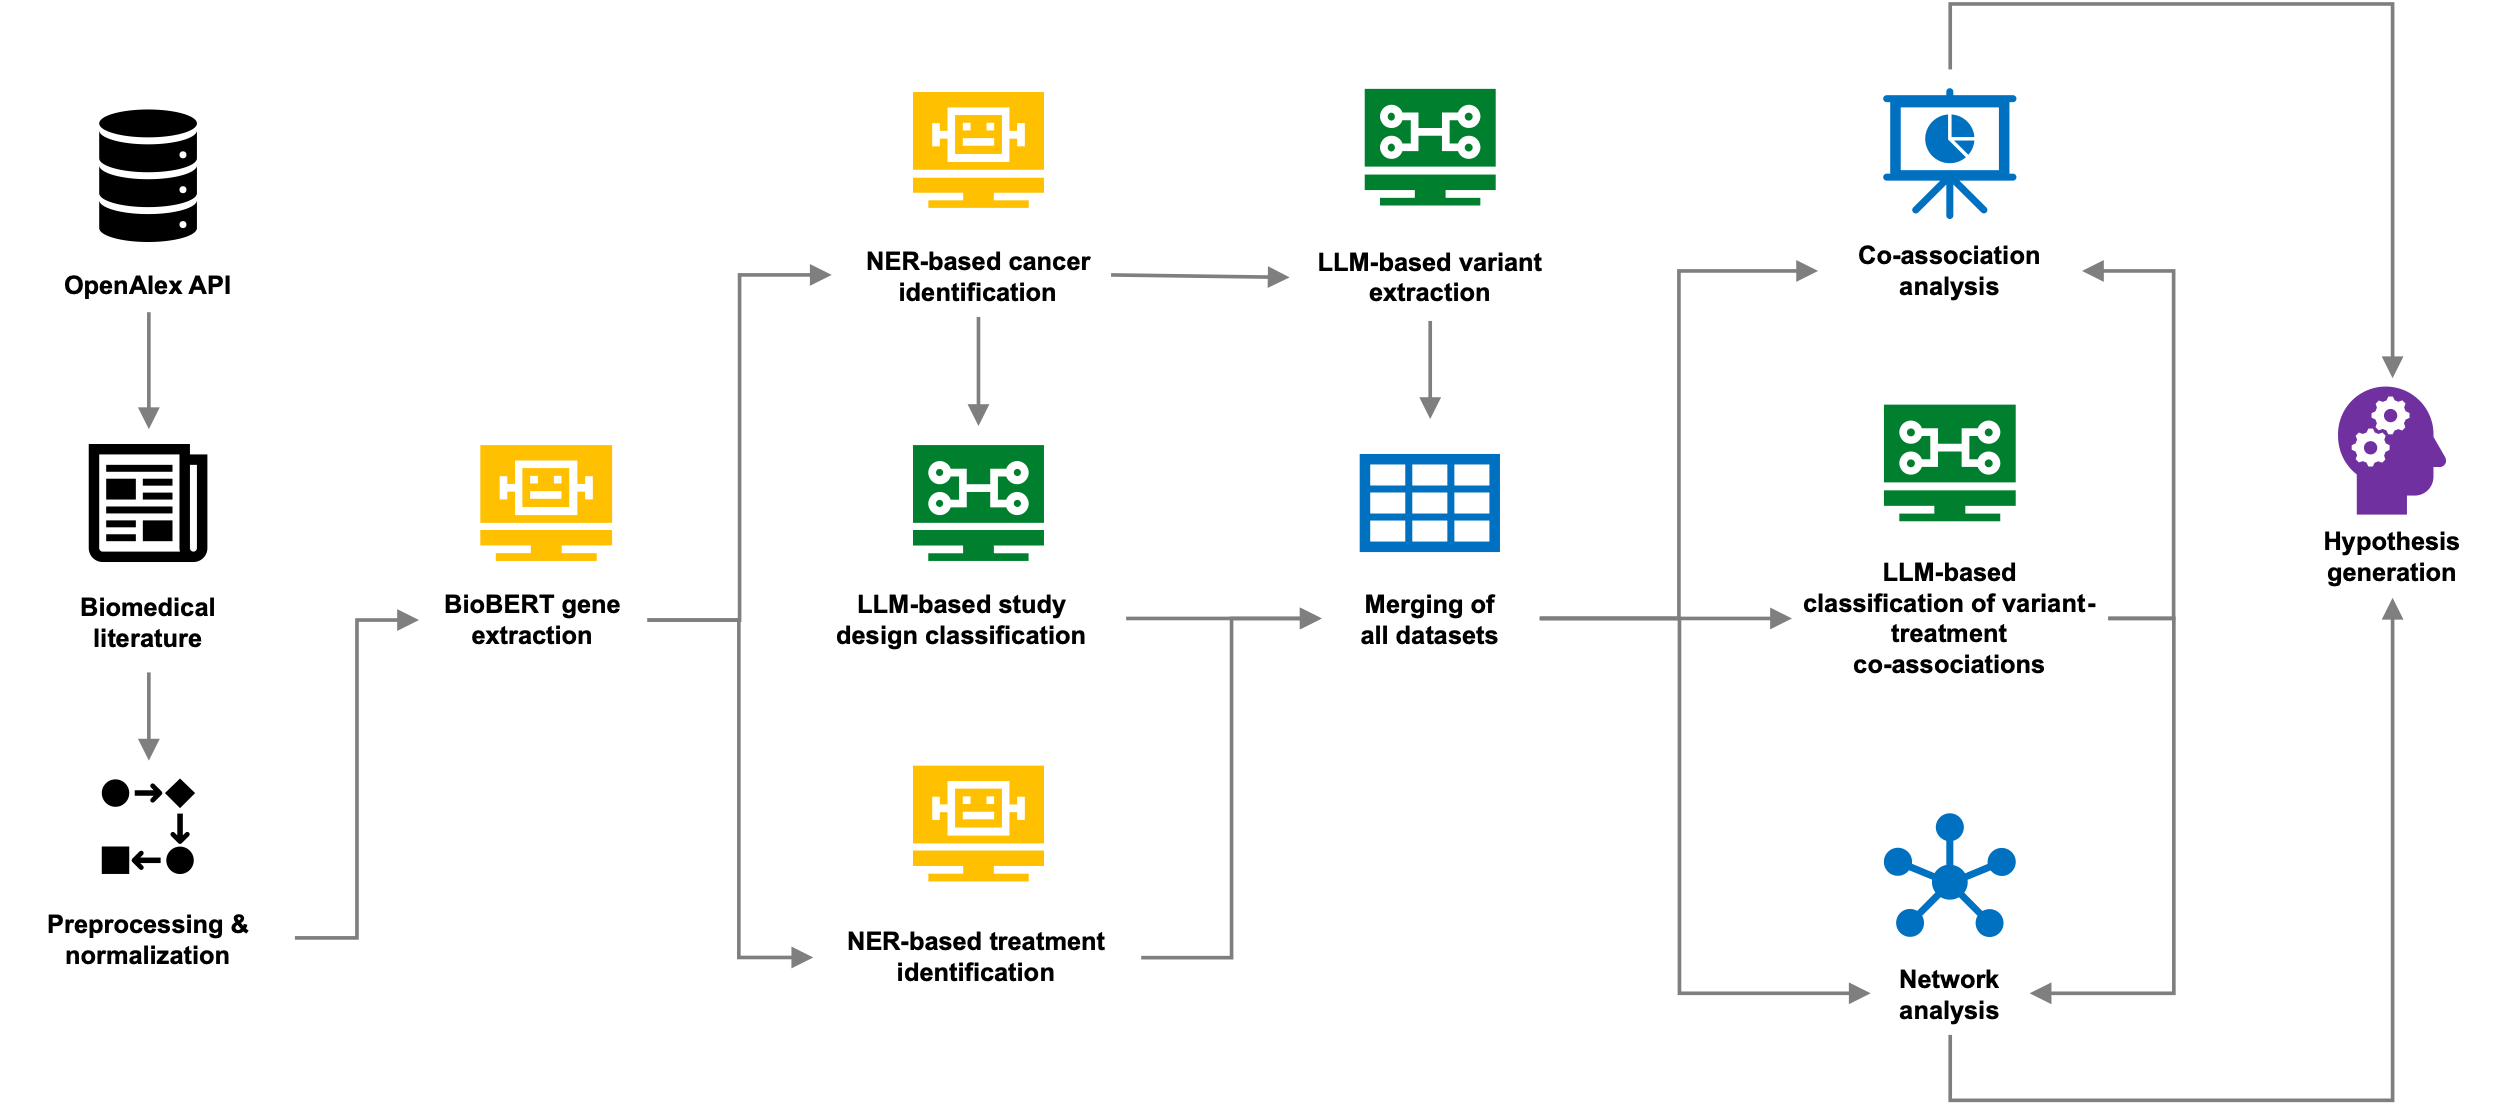
*

Supplementary information 2.: Performance evaluation of cancer type extraction.

| **Approach/model** | **Precision** | **Recall** | **Accuracy** | **F1 Score** |
| --- | --- | --- | --- | --- |
| SciSpaCy en_ner_bionlp13cg_md and en_ner_bc5cdr_md combined | 1 | 0.80 | 0.80 | 0.89 |
| SciSpaCy en_ner_bionlp13cg_md | 1 | 0.72 | 0.72 | 0.84 |
| SciSpaCy en_ner_bc5cdr_md | 1 | 0.77 | 0.77 | 0.87 |

Supplementary information 3: Performance evaluation of treatment extraction.

| **Approach/model** | **Precision** | **Recall** | **Accuracy** | **F1 Score** |
| --- | --- | --- | --- | --- |
| Ontology-guided NER | 0.96 | 0.95 | 0.95 | 0.95 |
| SciSpaCy en_ner_bionlp13cg_md and en_ner_bc5cdr_md | 0.44 | 0.32 | 0.58 | 0.37 |
| BioBERT alvaroalon2/biobert_chemical_ner | 0.71 | 0.68 | 0.70 | 0.70 |

Supplementary information 4: Performance evaluation of large language model prompts for study design classification.

| **Prompt number** | **Prompt Text** | **Precision** | **Recall** | **Accuracy** | **F1 Score** |
| --- | --- | --- | --- | --- | --- |
| Prompt1 | INSTRUCTION: You are a helpful classifier. You are given the abstract of a scientific, biomedical publication and you have to select the correct of the possible categories. The topic of the classification is '[TOPIC]'. The allowed categories are '[CATEGORIES]'. QUESTION: The abstract to be classified is '[TEXT]'. ANSWER: The correct category for this abstract is "". | 0.93 | 0.92 | 0.92 | 0.92 |
| Prompt2 | INSTRUCTION: You are a classifier for biomedical abstracts. Classify the given abstract under one of the predefined categories. CONTEXT: The classification topic is '[TOPIC]'. Allowed categories: [CATEGORIES]. QUESTION: The abstract to be classified is '[TEXT]'. REQUIREMENTS: - Select only one category from the list. - Do not create new categories. ANSWER: The correct category for this abstract is "". | 0.92 | 0.91 | 0.91 | 0.91 |
| Prompt3 | INSTRUCTION: You are a classifier for biomedical abstracts. Classify the given abstract under one of the predefined categories. Topic: '[TOPIC]'. Allowed categories: [CATEGORIES]. Abstract: '[TEXT]'. Select only one category. Do not create new categories. ANSWER: The correct category is "". | 0.93 | 0.92 | 0.92 | 0.92 |
| Prompt4 | INSTRUCTION: You are a helpful classifier. You are given the abstract of a scientific, biomedical publication and you have to select the correct of the possible study categories. The topic of the classification is '[TOPIC]'. The allowed categories are '[CATEGORIES]'. QUESTION: The abstract to be classified is '[TEXT]'. ANSWER: The correct category for this abstract is "". | 0.92 | 0.91 | 0.91 | 0.91 |

Supplementary information 5: Performance evaluation of large language model prompts for variant-treatment relationship classification.

| **Prompt number** | **Prompt Text** | **Precision** | **Recall** | **Accuracy** | **F1 Score** |
| --- | --- | --- | --- | --- | --- |
| Prompt1 | You are a biomedical research assistant analyzing the relationship between genetic variants and treatments based on scientific publications. Read the following title and abstract carefully, then evaluate each of the variant-treatment pairs listed. For each pair, classify the relationship described in the abstract using only one of the following labels: - Sensitive - Resistant - Diagnostic - Unrelated - Unknown Respond **only** with the list of pairs and their labels, in this format: <variant> + <treatment> : <label> | 0.48 | 0.35 | 0.35 | 0.33 |
| Prompt2 | You are analyzing biomedical literature to extract clinical relationships between gene variants and drugs. Using the information from the title and abstract, determine whether each of the following variant-treatment pairs has a meaningful clinical association. Label each pair using one of the following categories: Sensitive, Resistant, Diagnostic, Unrelated, Unknown. Format your output as follows: <variant> + <treatment> : <label> | 0.87 | 0.84 | 0.84 | 0.85 |
| Prompt3 | Carefully analyze the title and abstract of the following biomedical paper. Then evaluate the relationship between the listed variant-treatment pairs. Use only these labels: Sensitive, Resistant, Diagnostic, Unrelated, Unknown. Respond strictly in this format: <variant> + <treatment> : <label> | 0.63 | 0.5 | 0.5 | 0.51 |

Supplementary information 6: Temporal analysis of biomedical publications (2014-2024) from OpenAlex: yearly, monthly, and weekly trends.


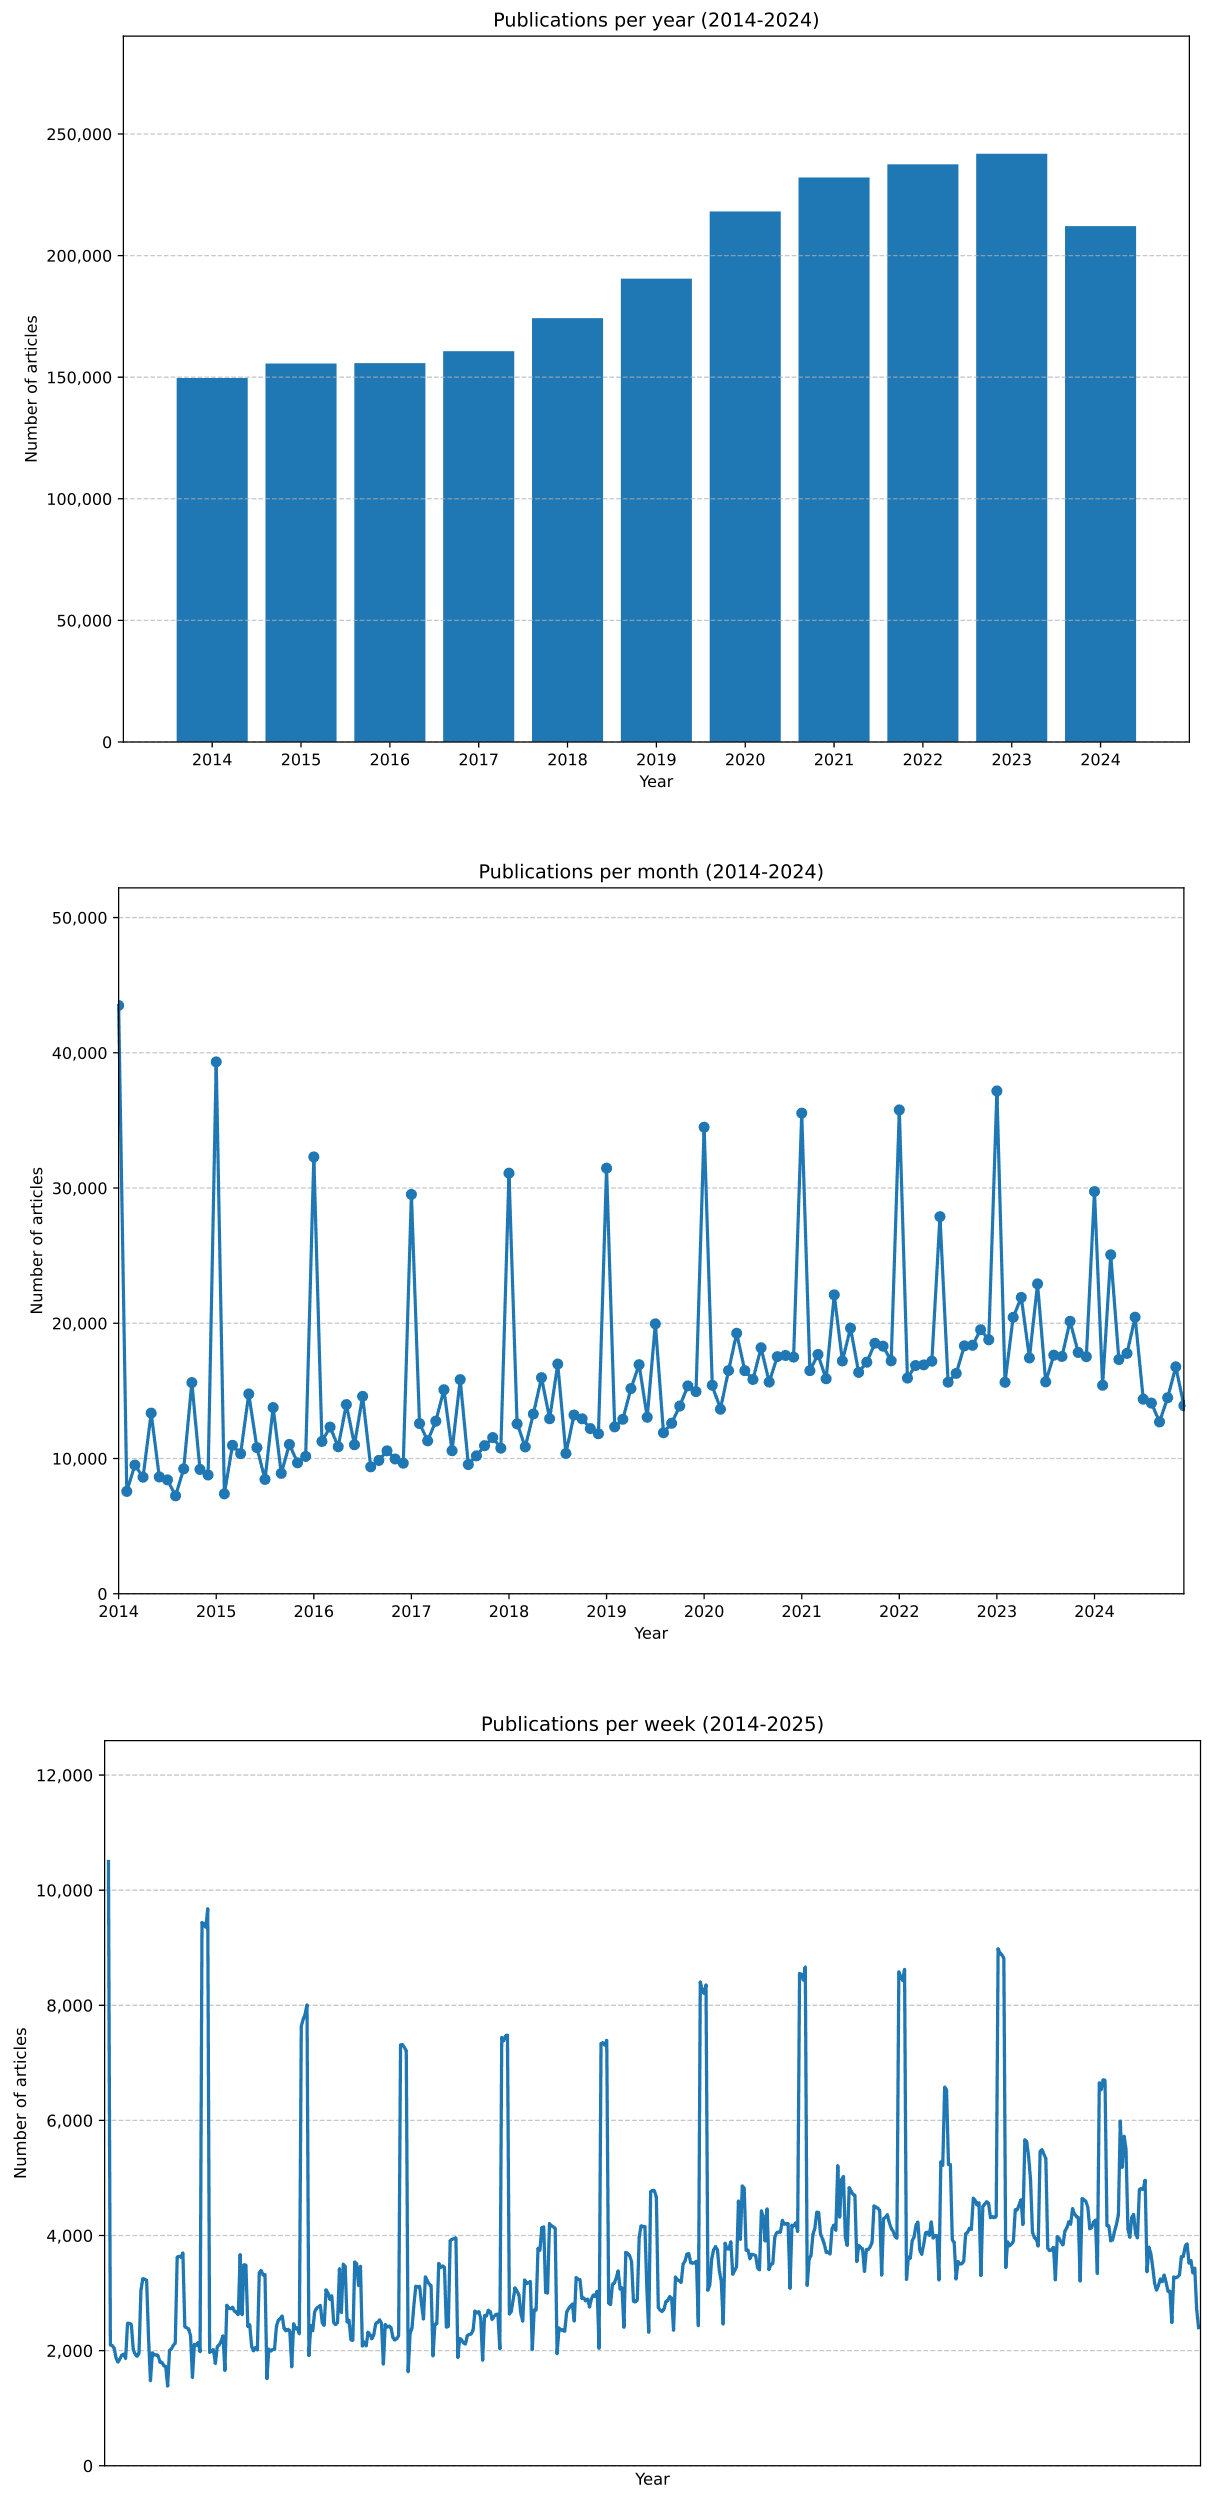


Supplementary information 7: Distribution of the number of gene mentions per biomedical publication.


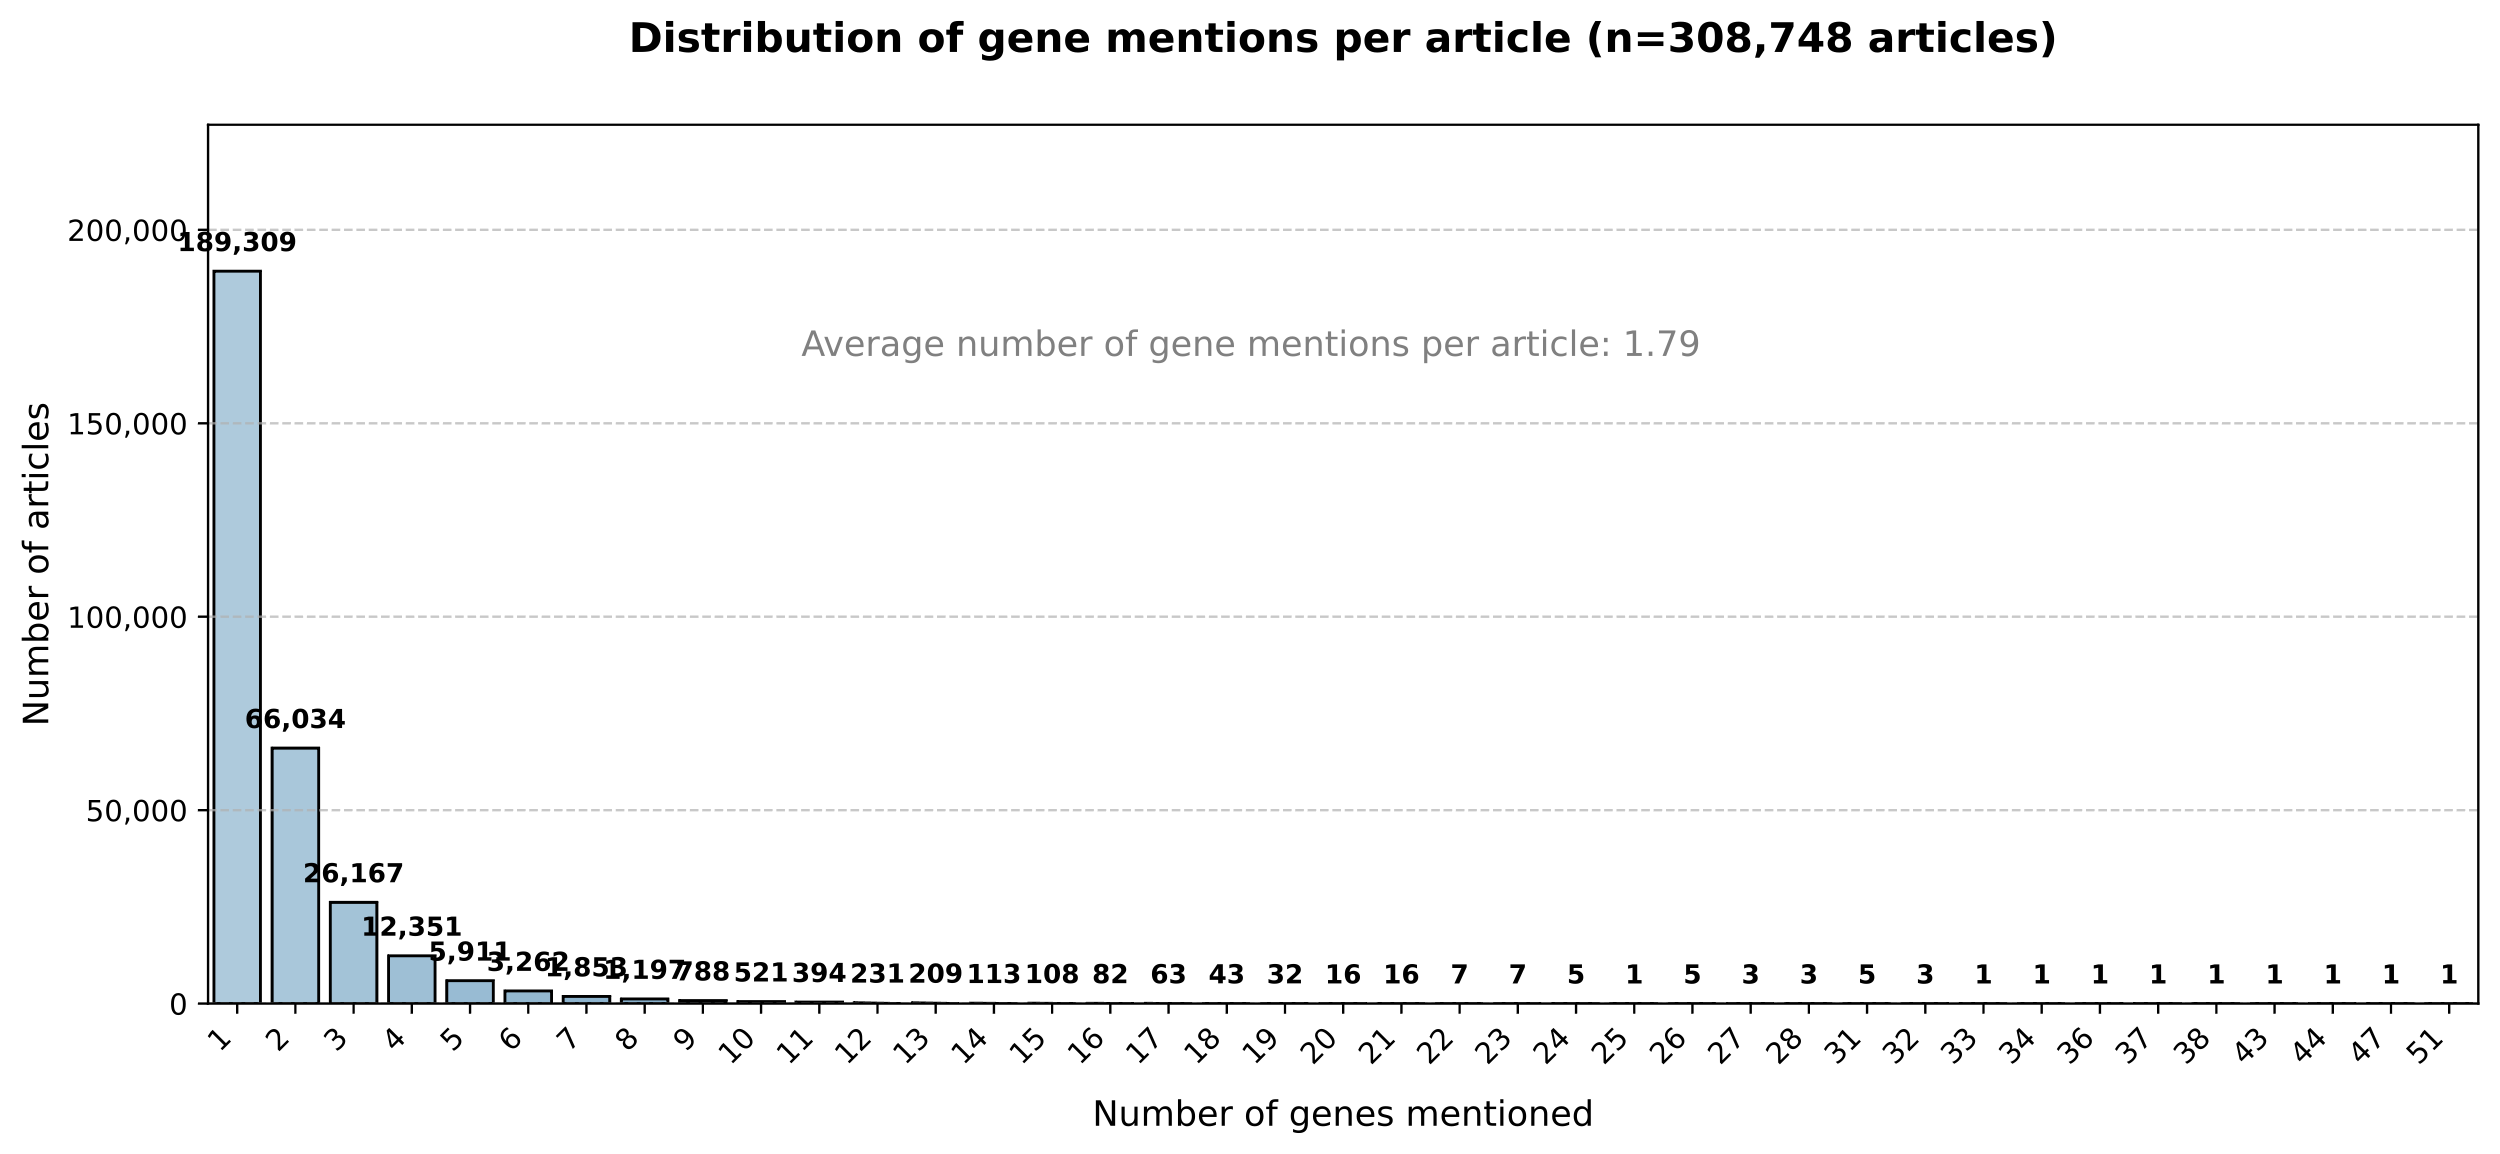


Supplementary information 8: Distribution of study design types across 199,726 articles classified by LLaMA-3.3-70b and the ‘General Classifier’.


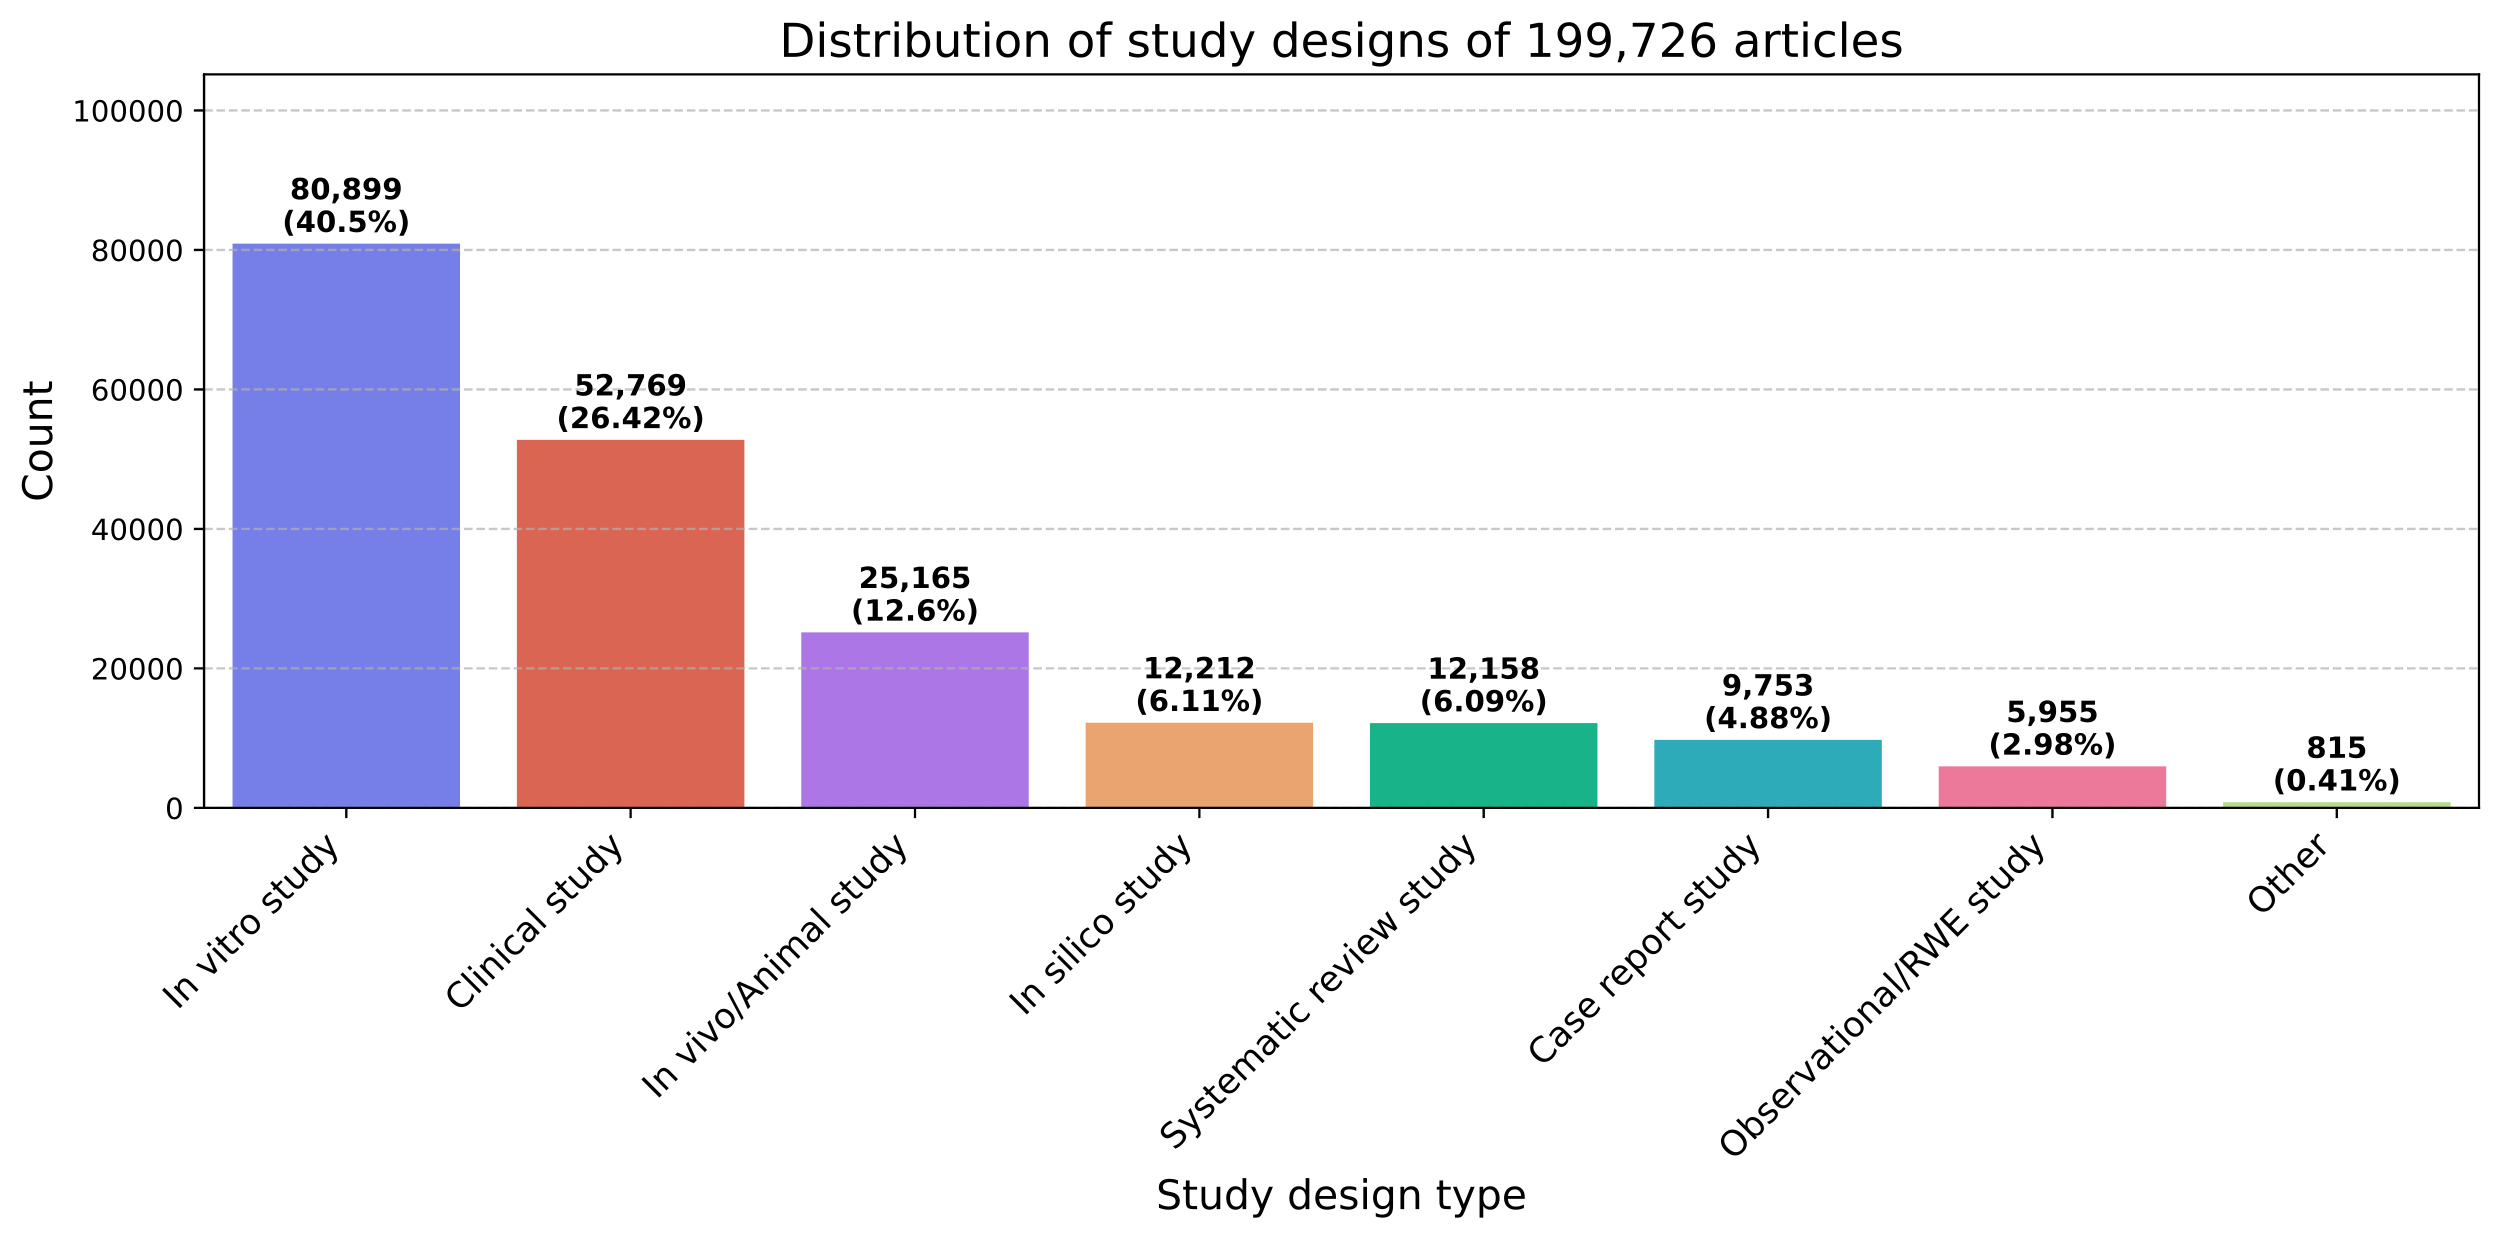


Supplementary information 9: Distribution of the most frequently mentioned specific treatments identified in the 126,195 articles (40.87%) containing treatments of the total 308,748 publications screened.

**
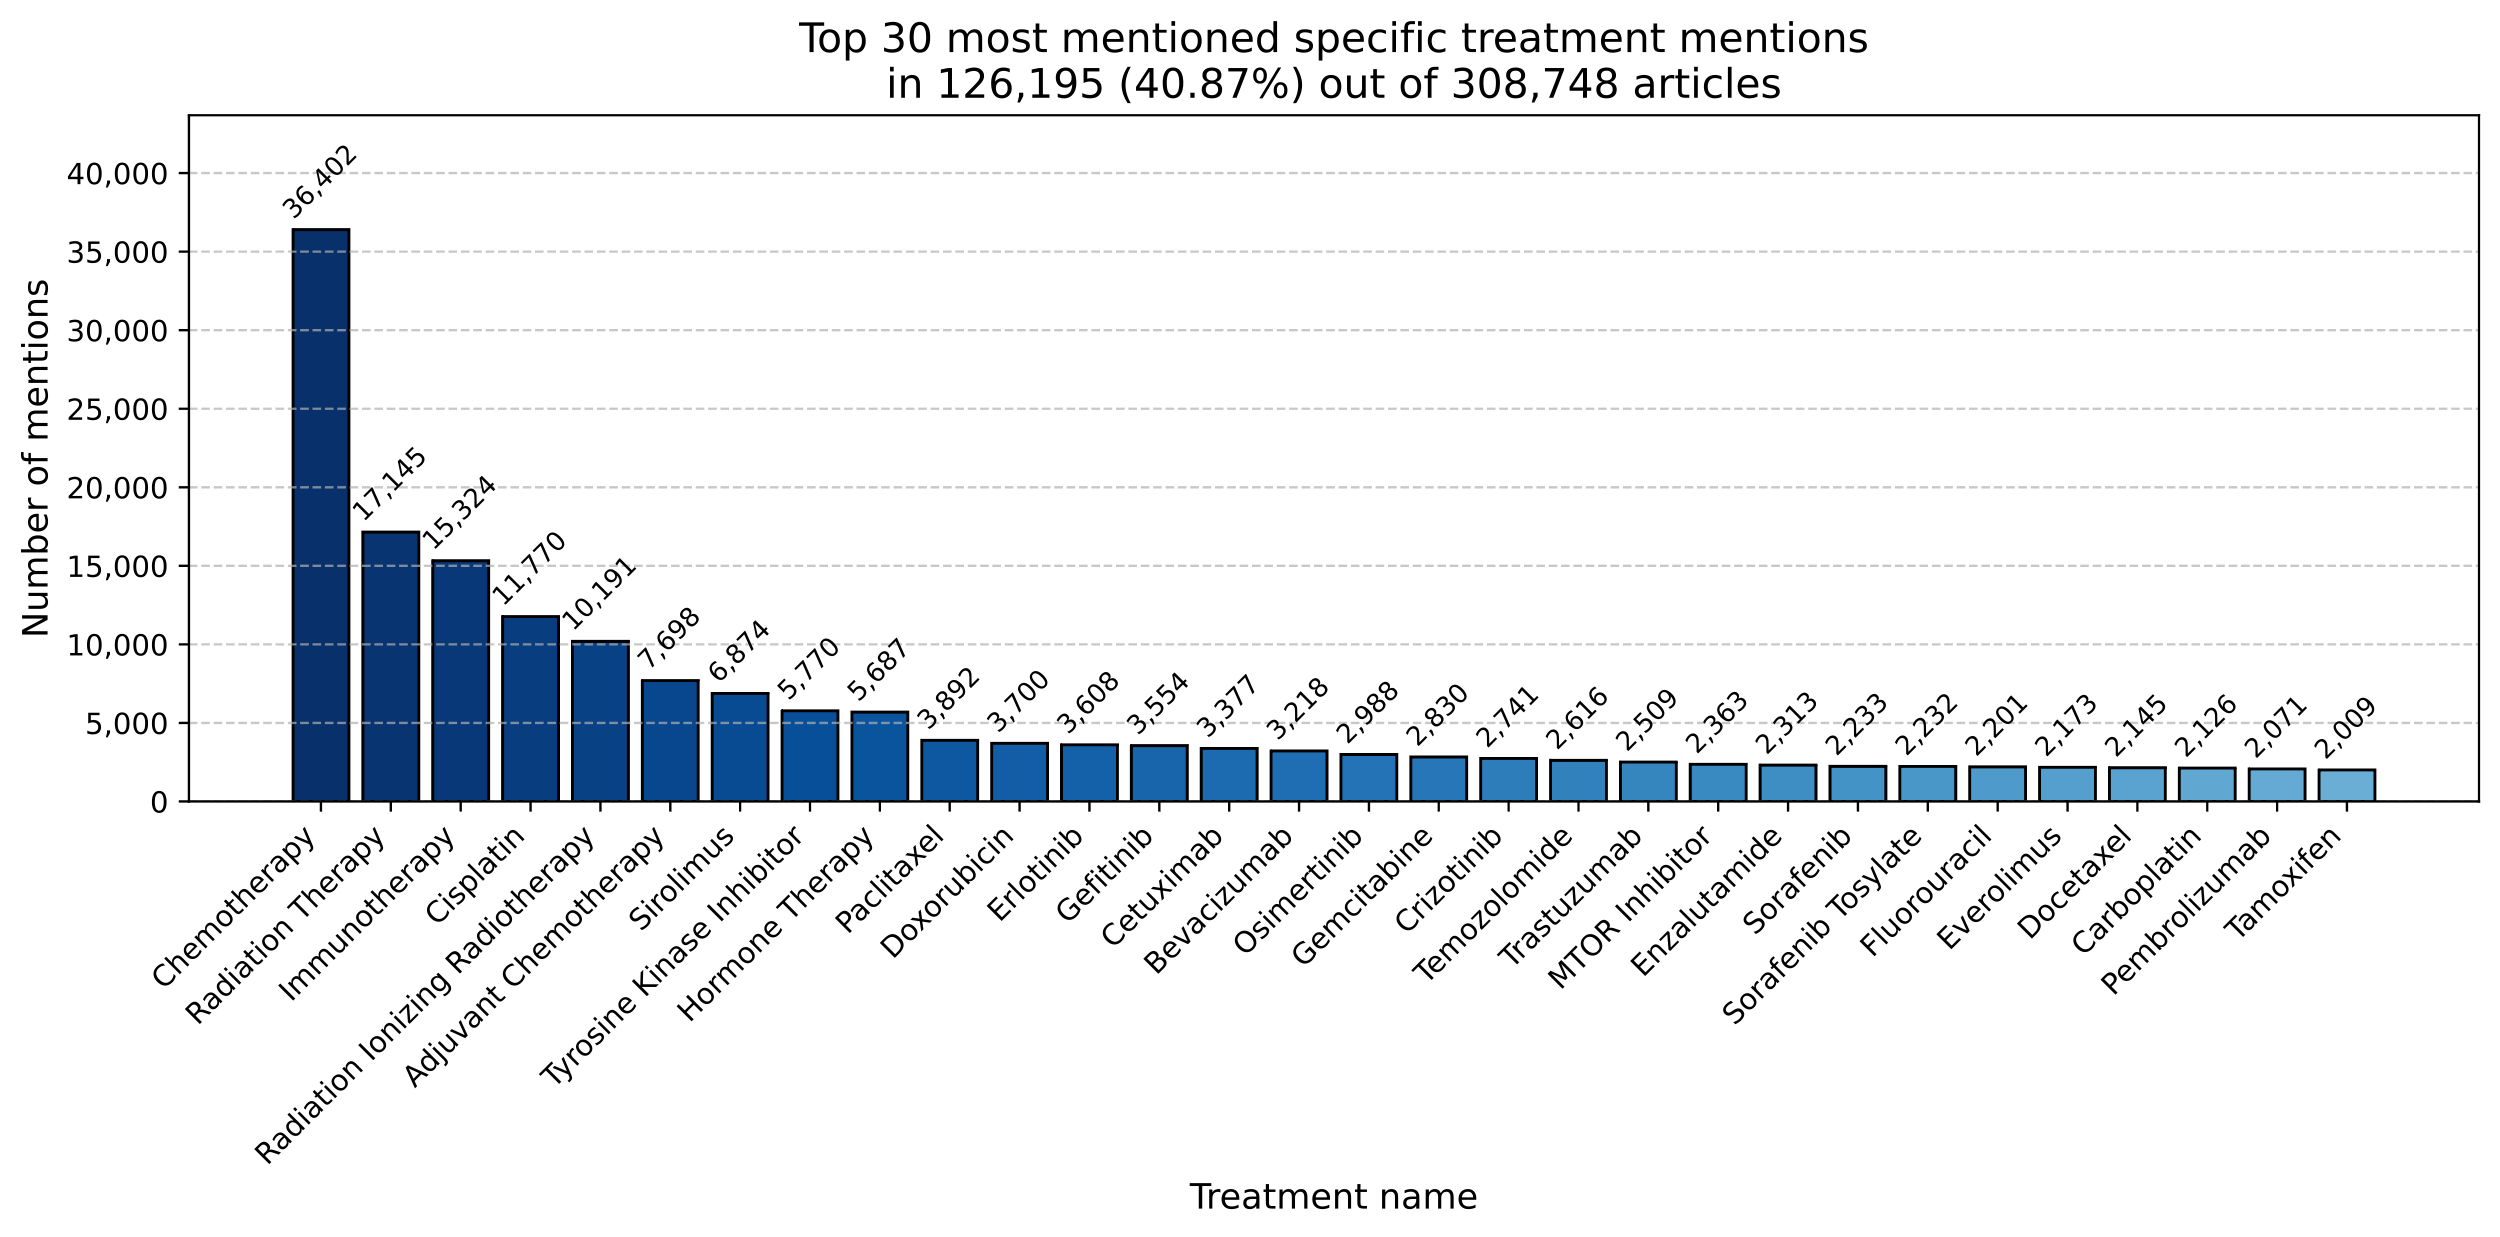
**

Supplementary information 10: Top 20 most frequent mentions of variants of 16,508 articles containing variants extracted by LLaMA-3.3-70b.


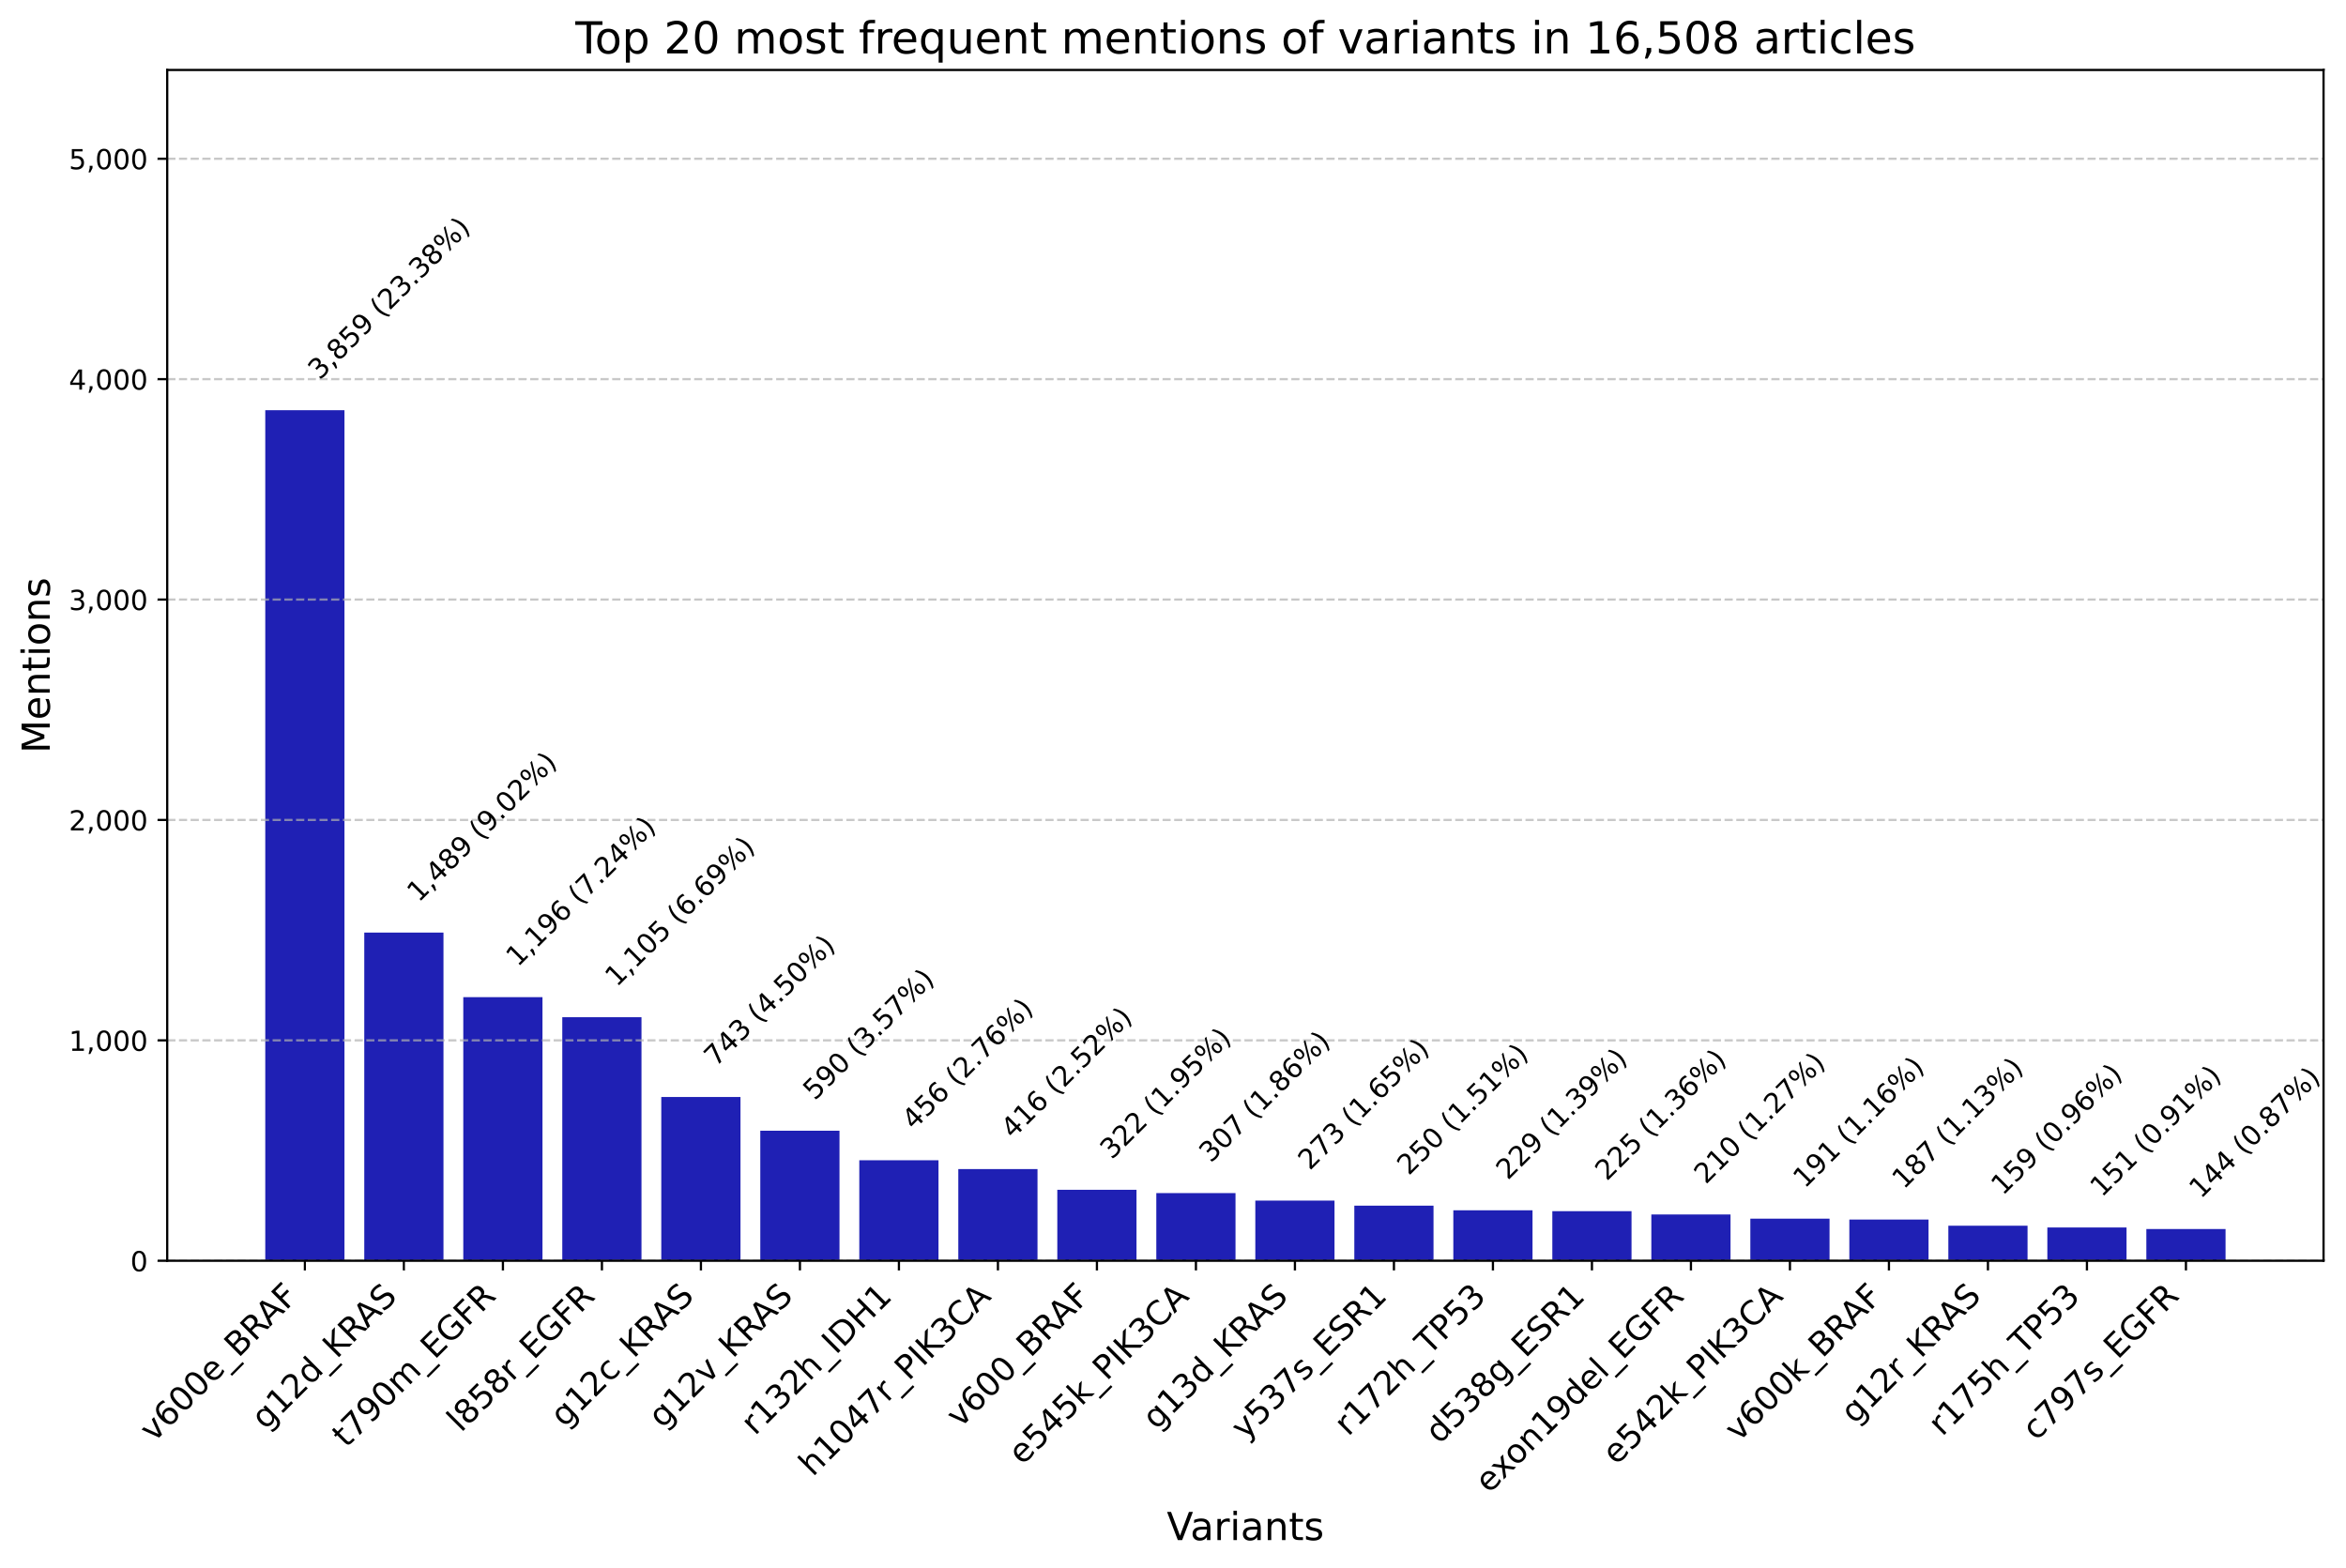


Supplementary information 11: Variant-associated extraction of Oncomine genes.


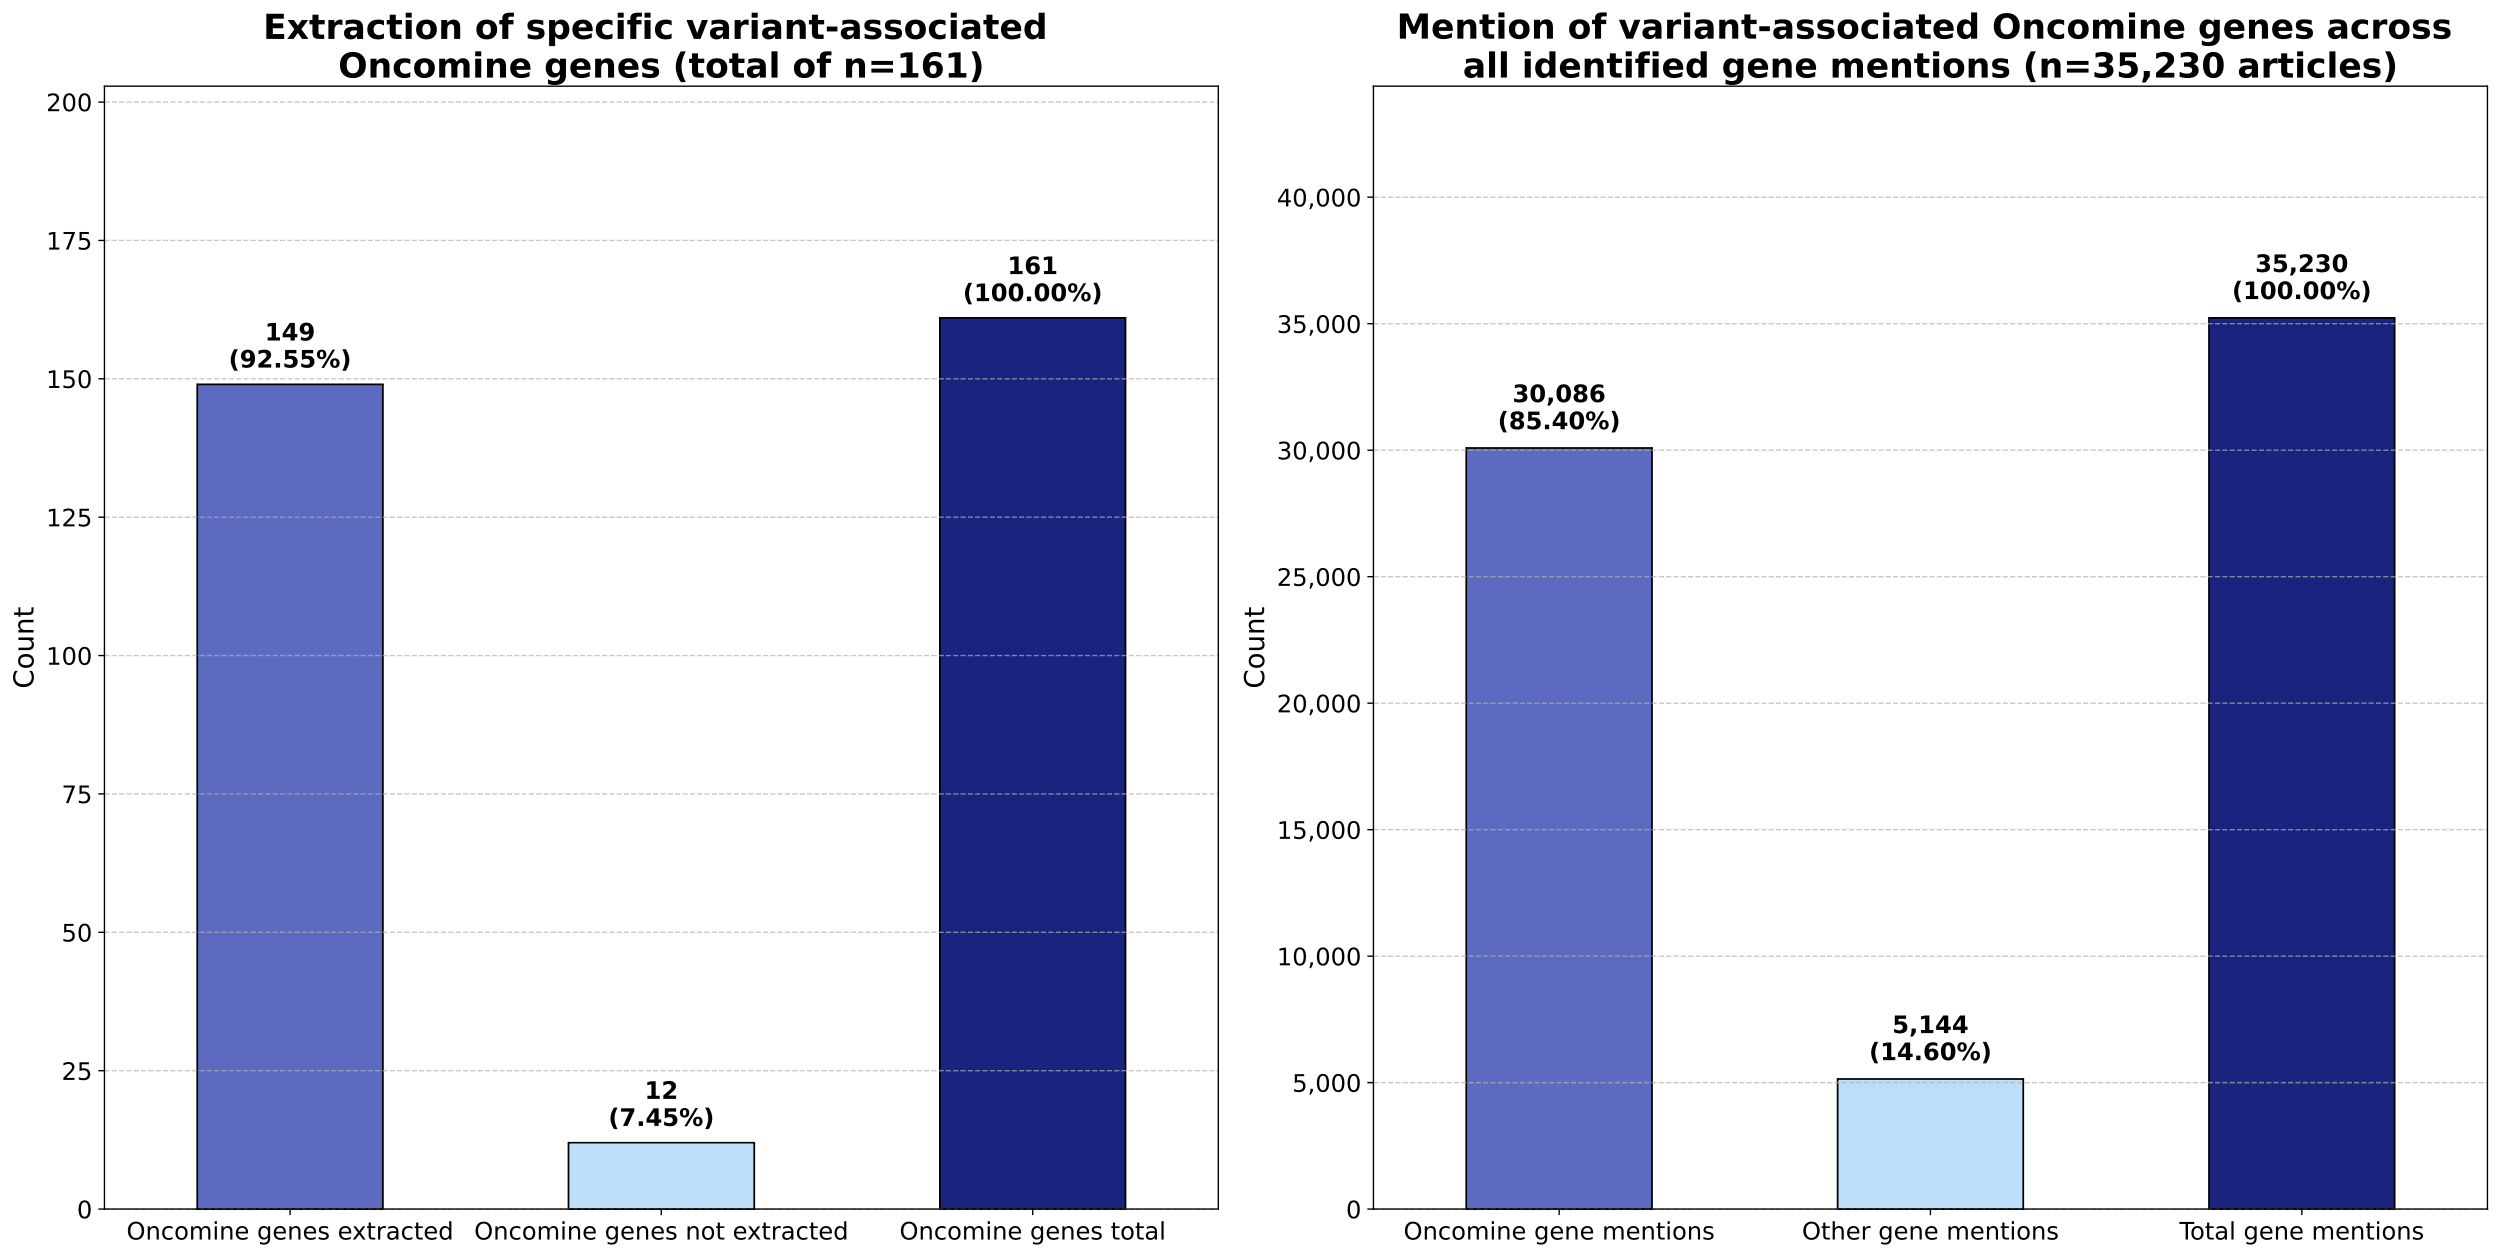


- Variant-associated Oncomine genes not extracted:

*ETV5, FGF19, FGF3, FGR, MAGOH, MYB, MYBL1, MYCL, NUTM1, RHEB, RSPO2, RSPO3.*

- Variant-associated Oncomine extracted:

*AKT1, AKT2, AKT3, ALK, AR, ARAF, ARID1A, ATM, ATR, ATRX, AXL, BAP1, BRAF, BRCA1, BRCA2, BTK, CBL, CCND1, CCND2, CCND3, CCNE1, CDK12, CDK2, CDK4, CDK6, CDKN1B, CDKN2A, CDKN2B, CHEK1, CHEK2, CREBBP, CSF1R, CTNNB1, DDR2, EGFR, ERBB2, ERBB3, ERBB4, ERCC2, ERG, ESR1, ETV1, ETV4, EZH2, FANCA, FANCD2, FANCI, FBXW7, FGFR1, FGFR2, FGFR3, FGFR4, FLT3, FOXL2, GATA2, GNA11, GNAQ, GNAS, H3F3A, HIST1H3B, HNF1A, HRAS, IDH1, IDH2, IGF1R, JAK1, JAK2, JAK3, KDR, KIT, KNSTRN, KRAS, MAP2K1, MAP2K2, MAP2K4, MAPK1, MAX, MDM2, MDM4, MED12, MET, MLH1, MRE11, MSH2, MSH6, MTOR, MYC, MYCN, MYD88, NBN, NF1, NF2, NFE2L2, NOTCH1, NOTCH2, NOTCH3, NOTCH4, NRAS, NRG1, NTRK1, NTRK2, NTRK3, PALB2, PDGFRA, PDGFRB, PIK3CA, PIK3CB, PIK3R1, PMS2, POLE, PPARG, PPP2R1A, PRKACA, PRKACB, PTCH1, PTEN, PTPN11, RAC1, RAD50, RAD51, RAD51B, RAD51C, RAD51D, RAF1, RB1, RELA, RET, RHOA, RICTOR, RNF43, ROS1, SETD2, SF3B1, SLX4, SMAD4, SMARCA4, SMARCB1, SMO, SPOP, SRC, STAT3, STK11, TERT, TOP1, TP53, TSC1, TSC2, U2AF1, XPO1.*

Supplementary information 12: Progressive merging ad filtering of datasets from 307,748 detected articles with Oncomine gene mentions, to 7,524 (2.4%) of articles which contain all predefined conditions, including variants.


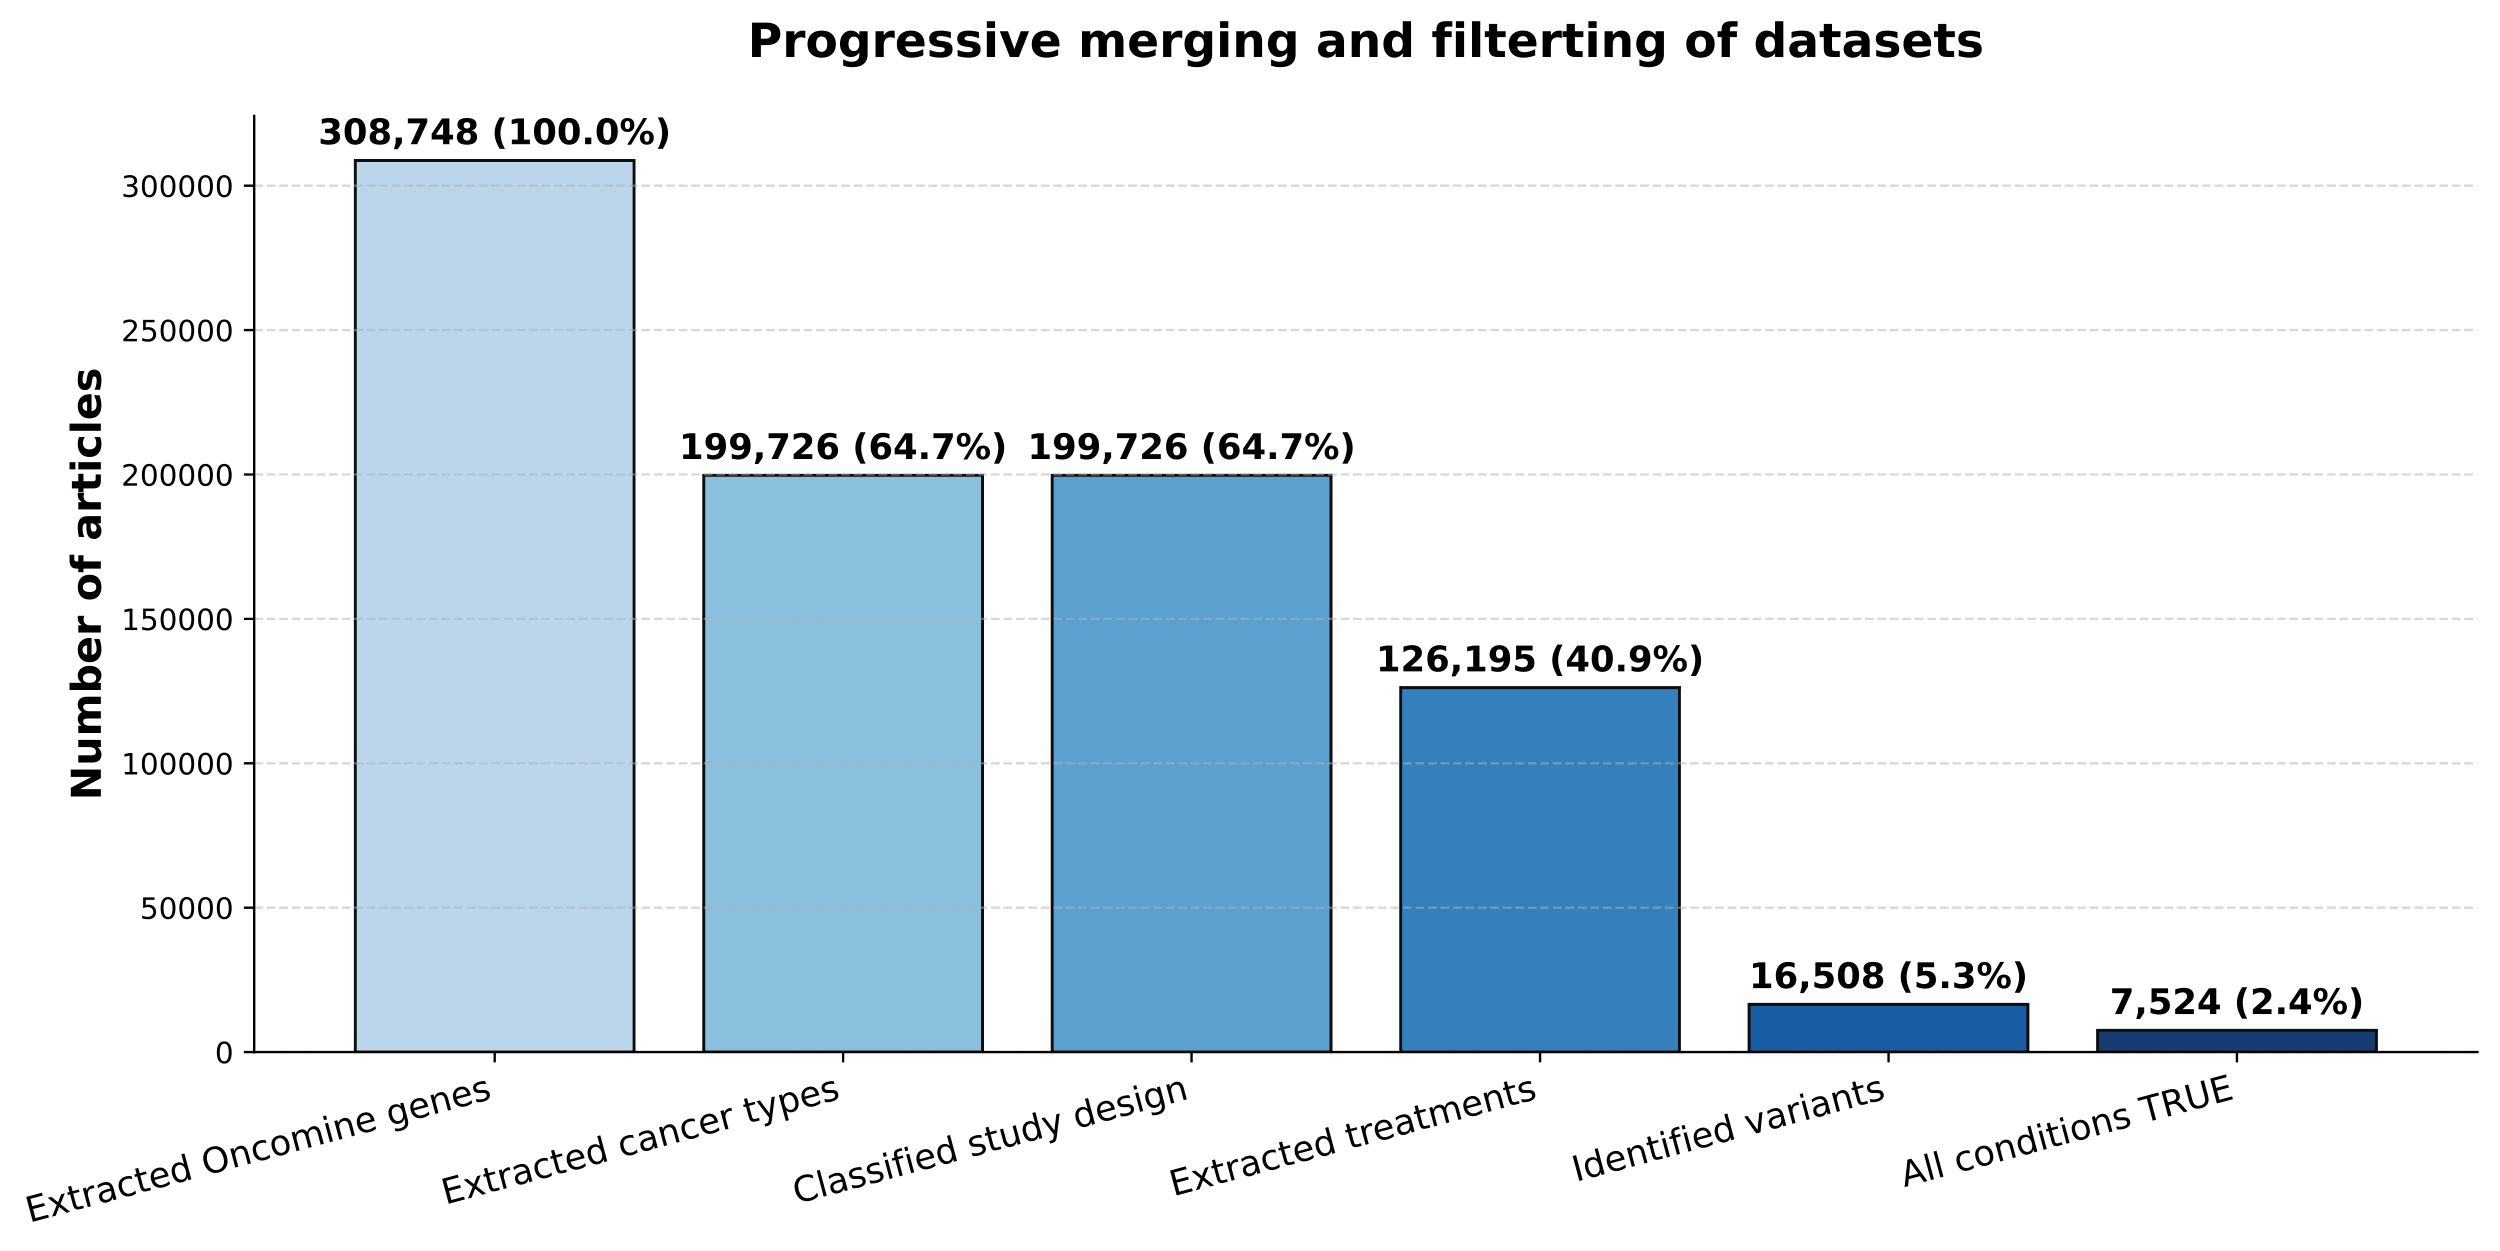


Supplementary information 13: Most mentioned treatment types in the final analysis dataset of 7,524 articles.


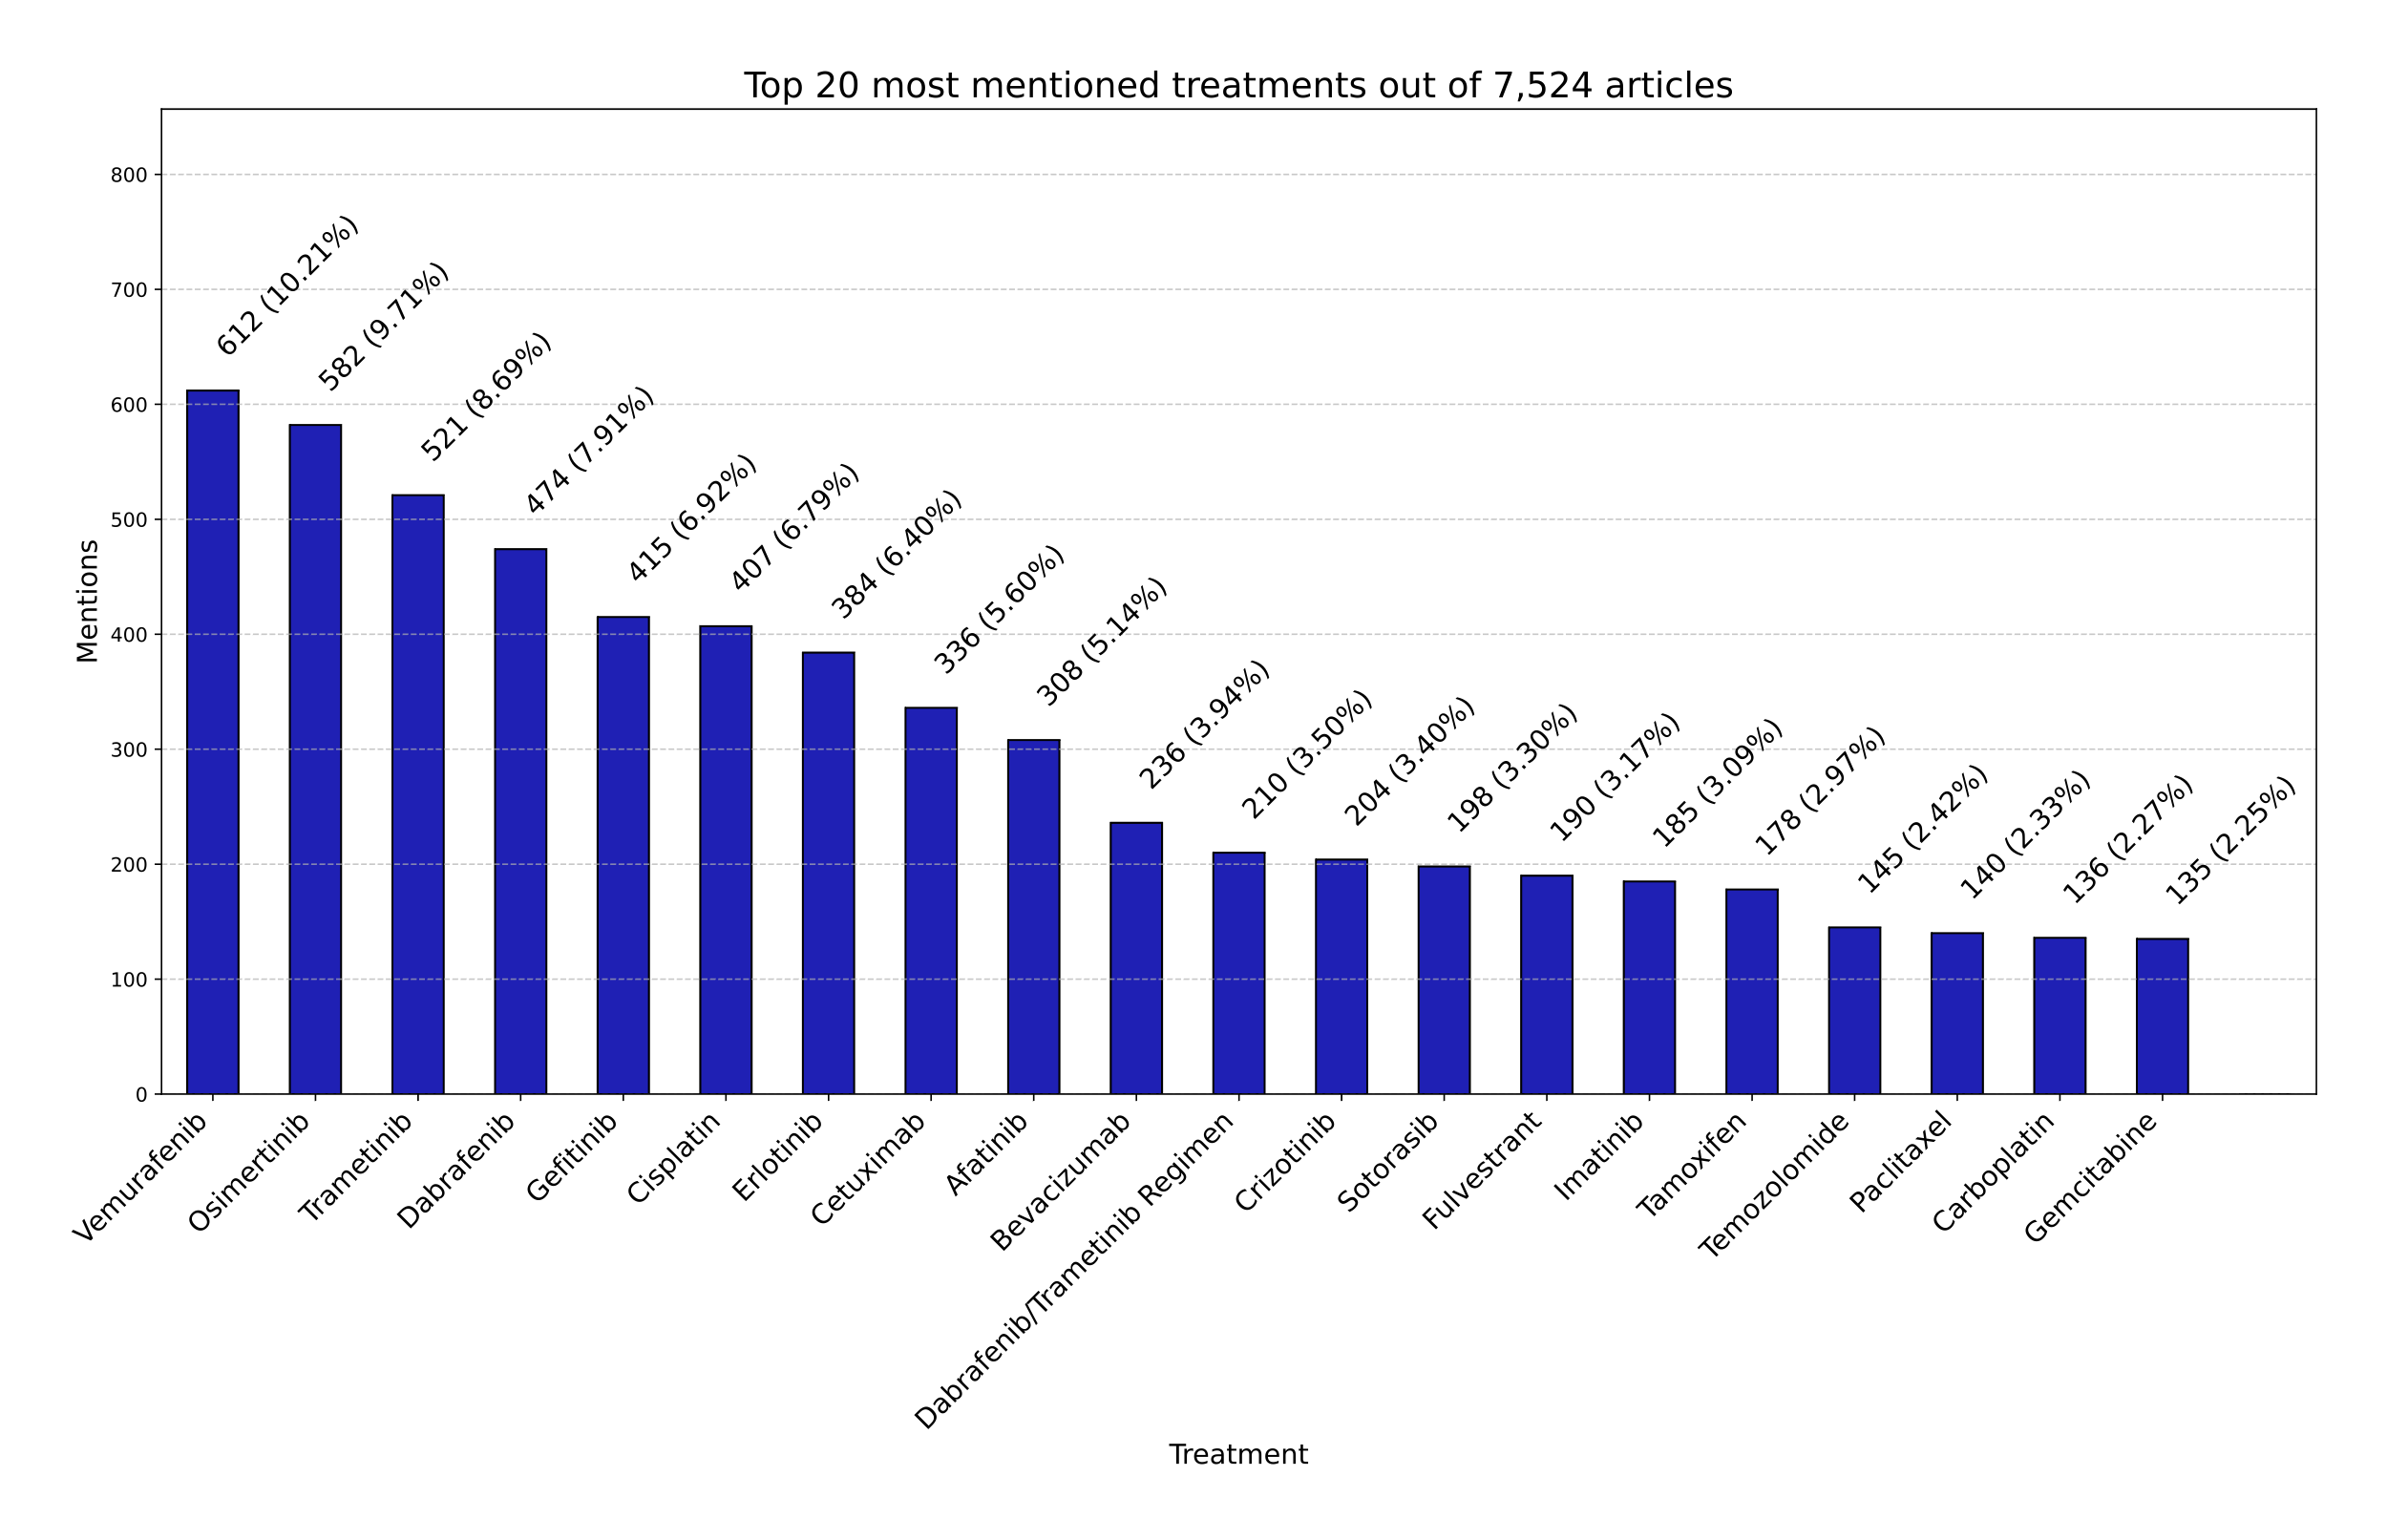


Supplementary information 14: Most mentioned cancer types in the final analysis dataset of 7,524 articles.


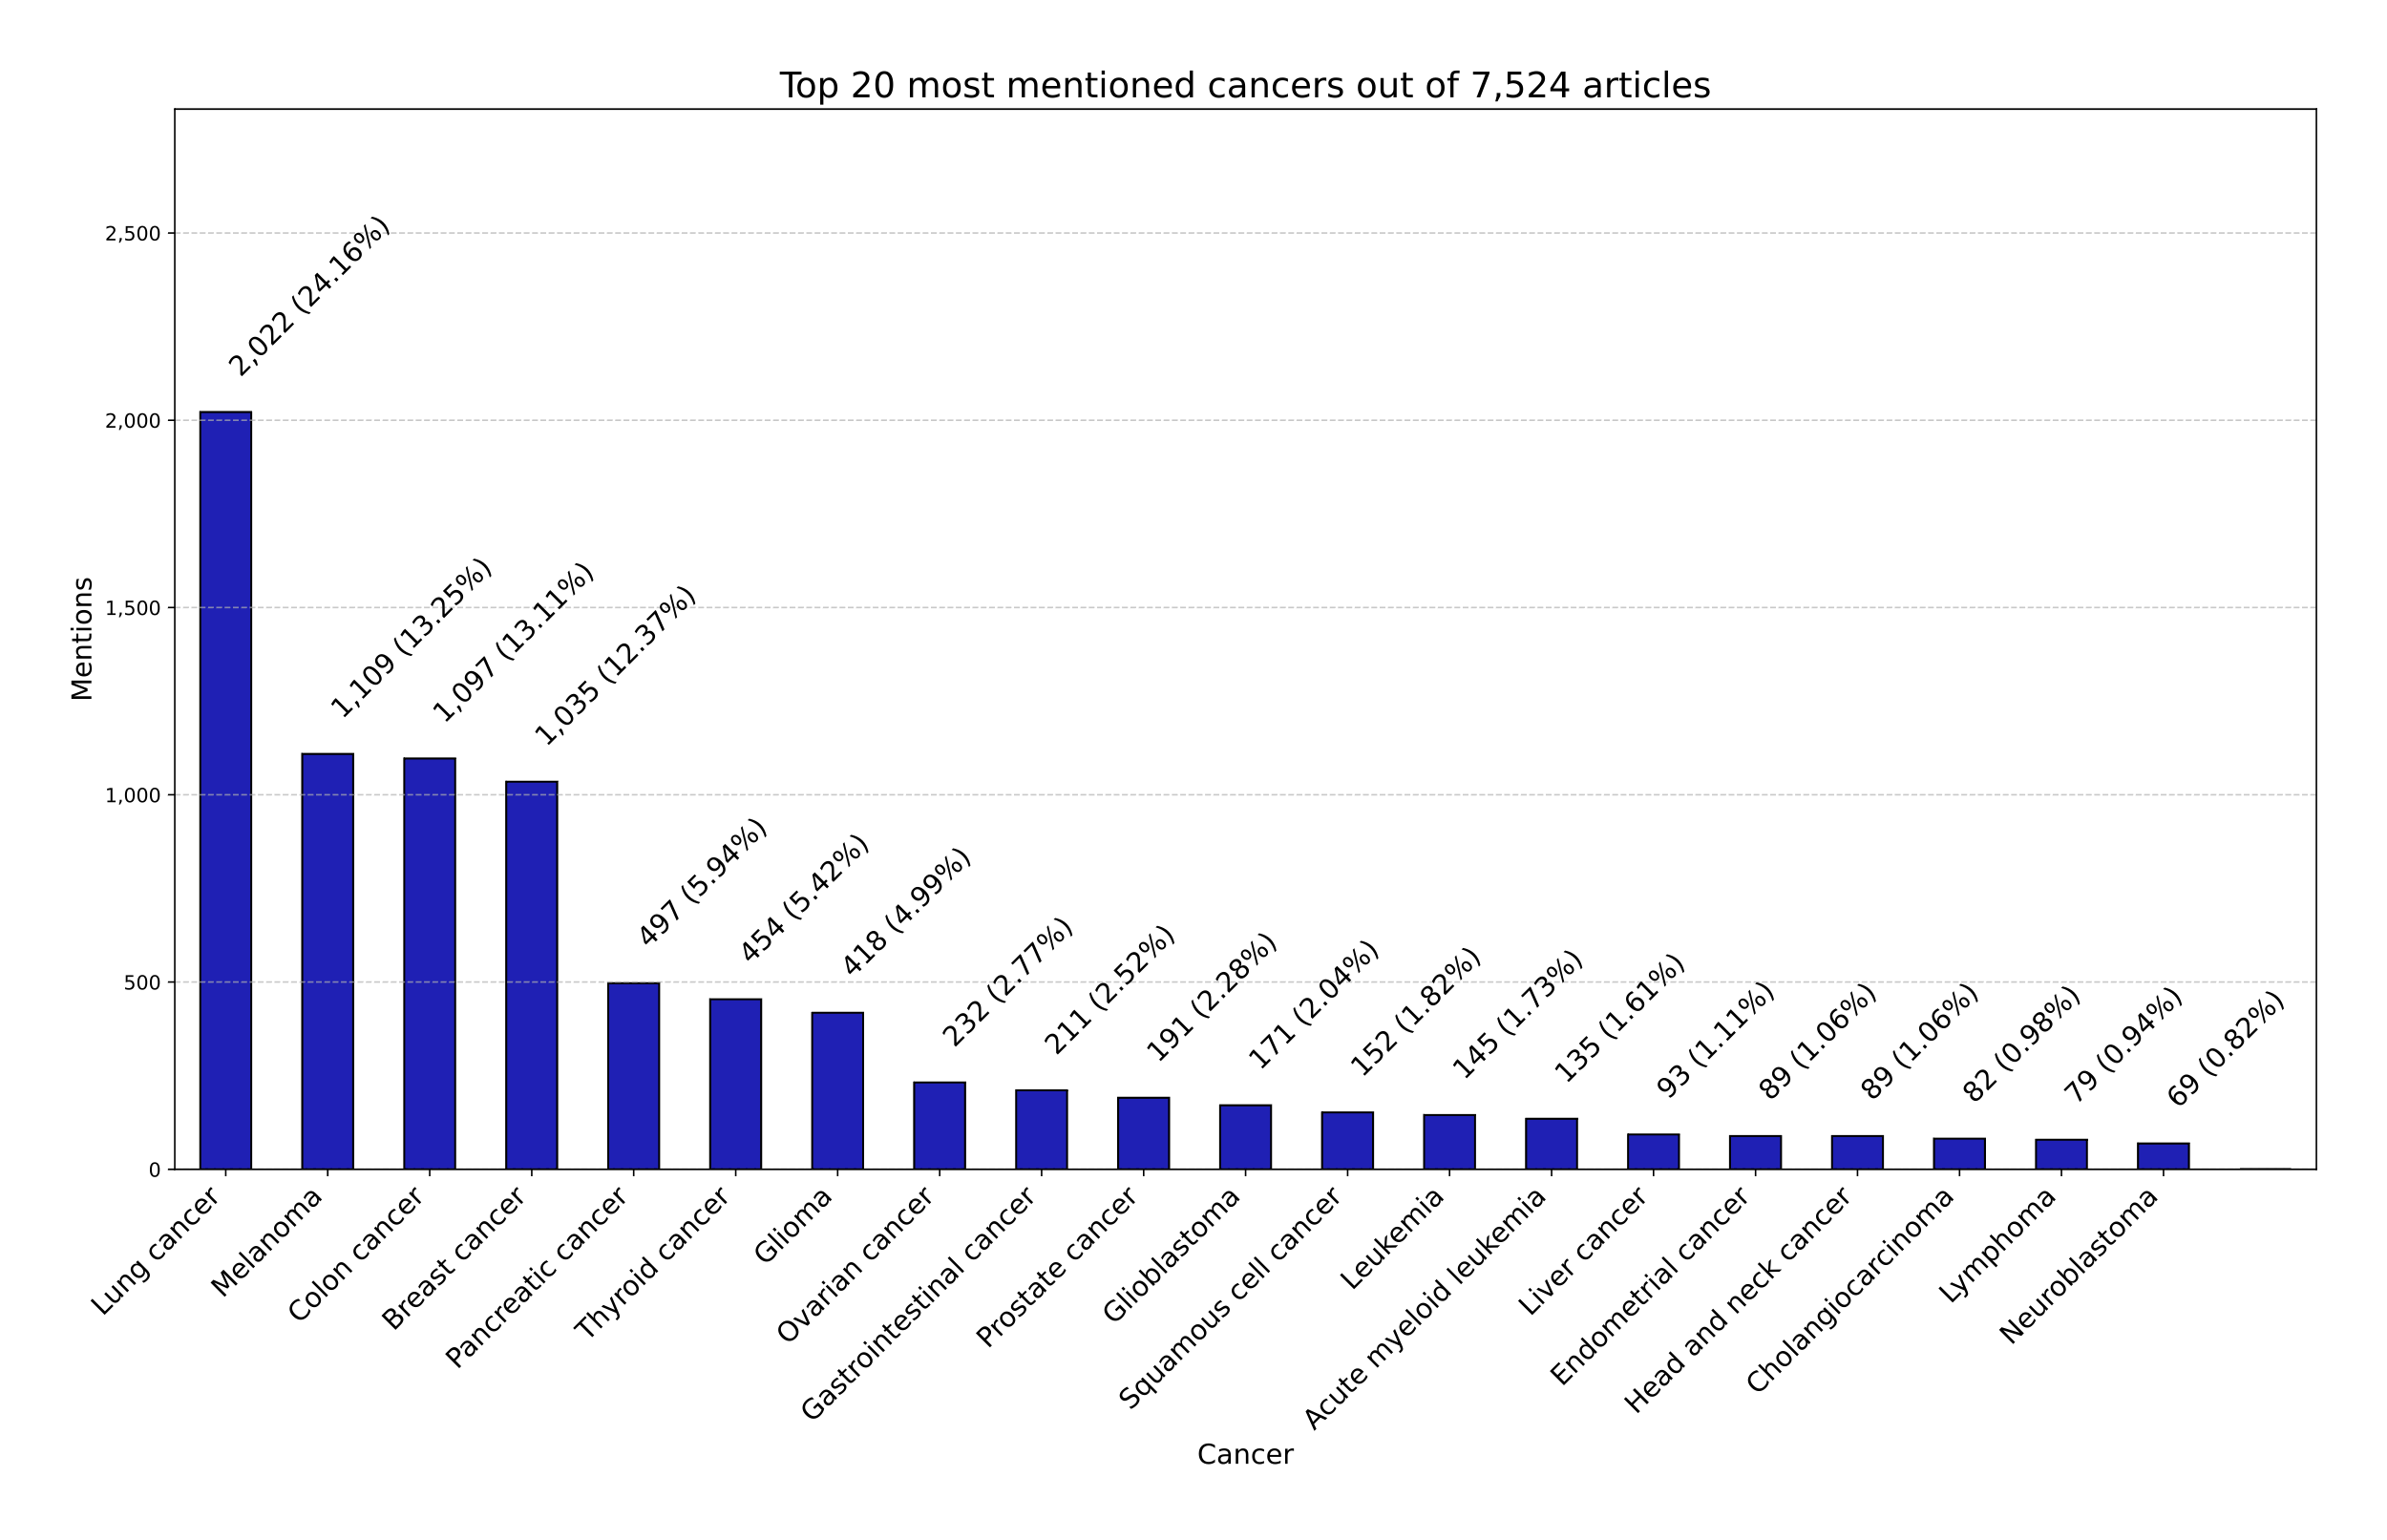


Supplementary information 15: Heatmap illustrating co-associations of variants and cancers.

**
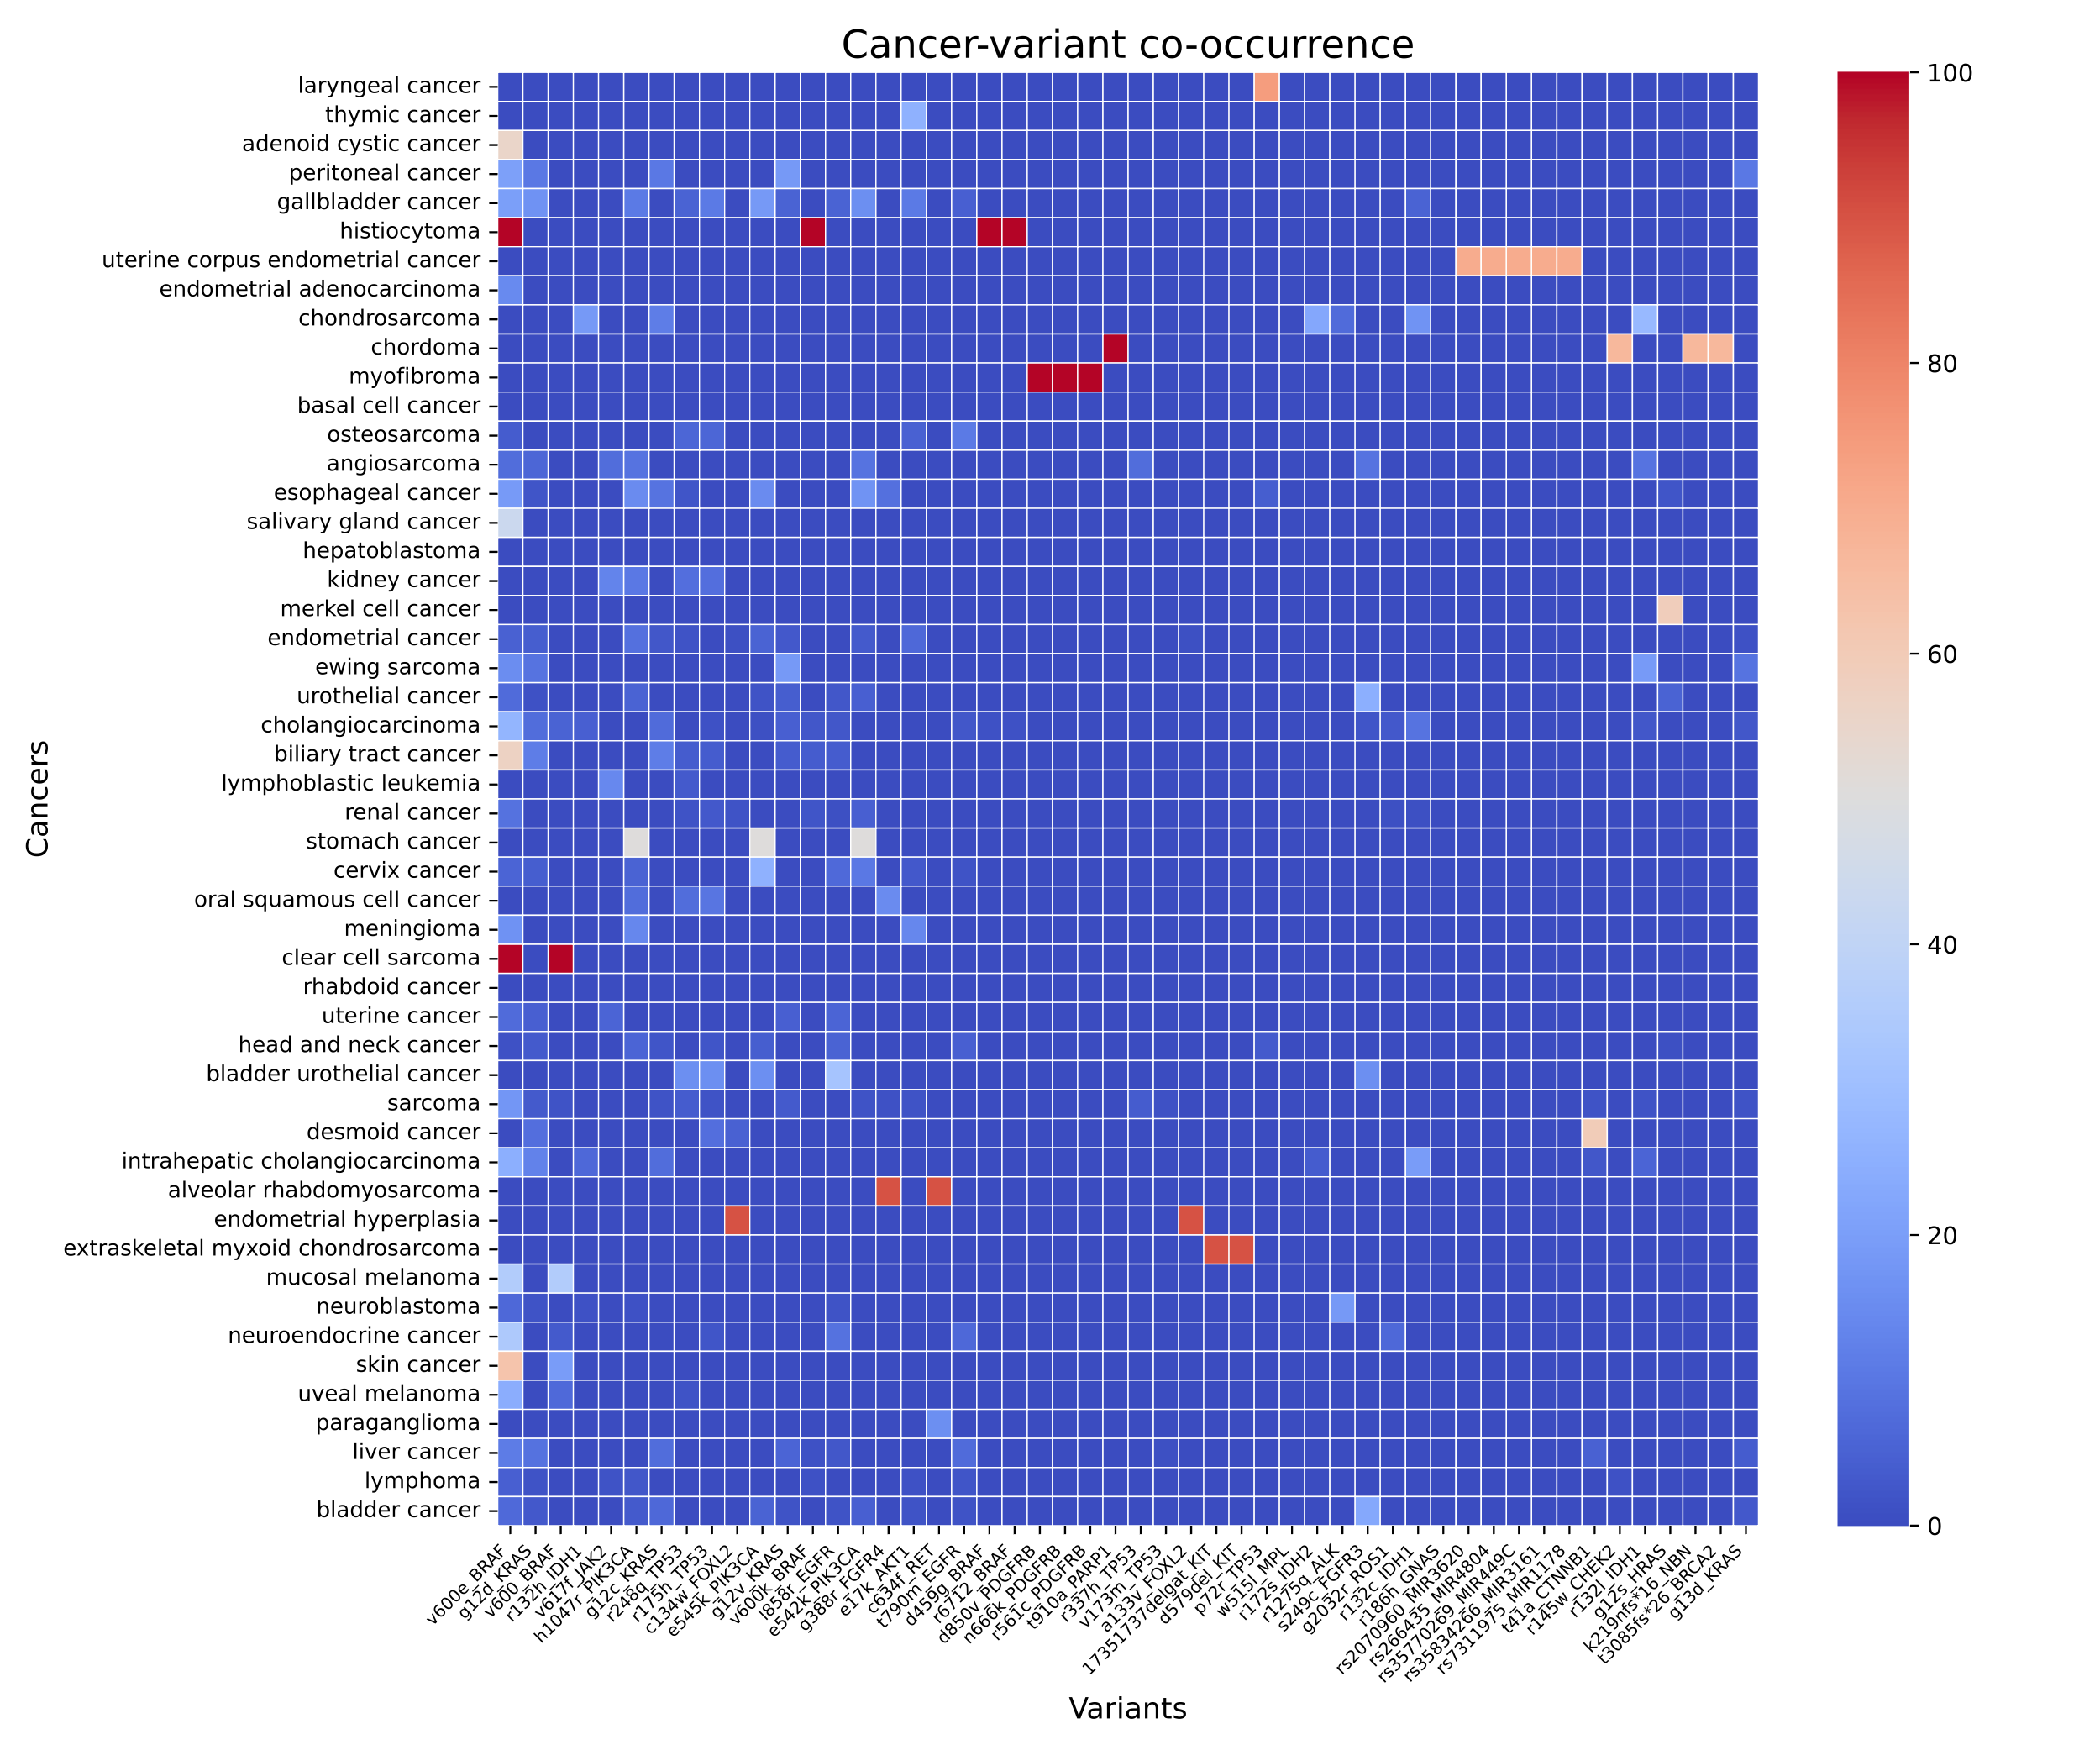
**

Supplementary information 16: Heatmap illustrating co-associations of cancers and treatments.

**
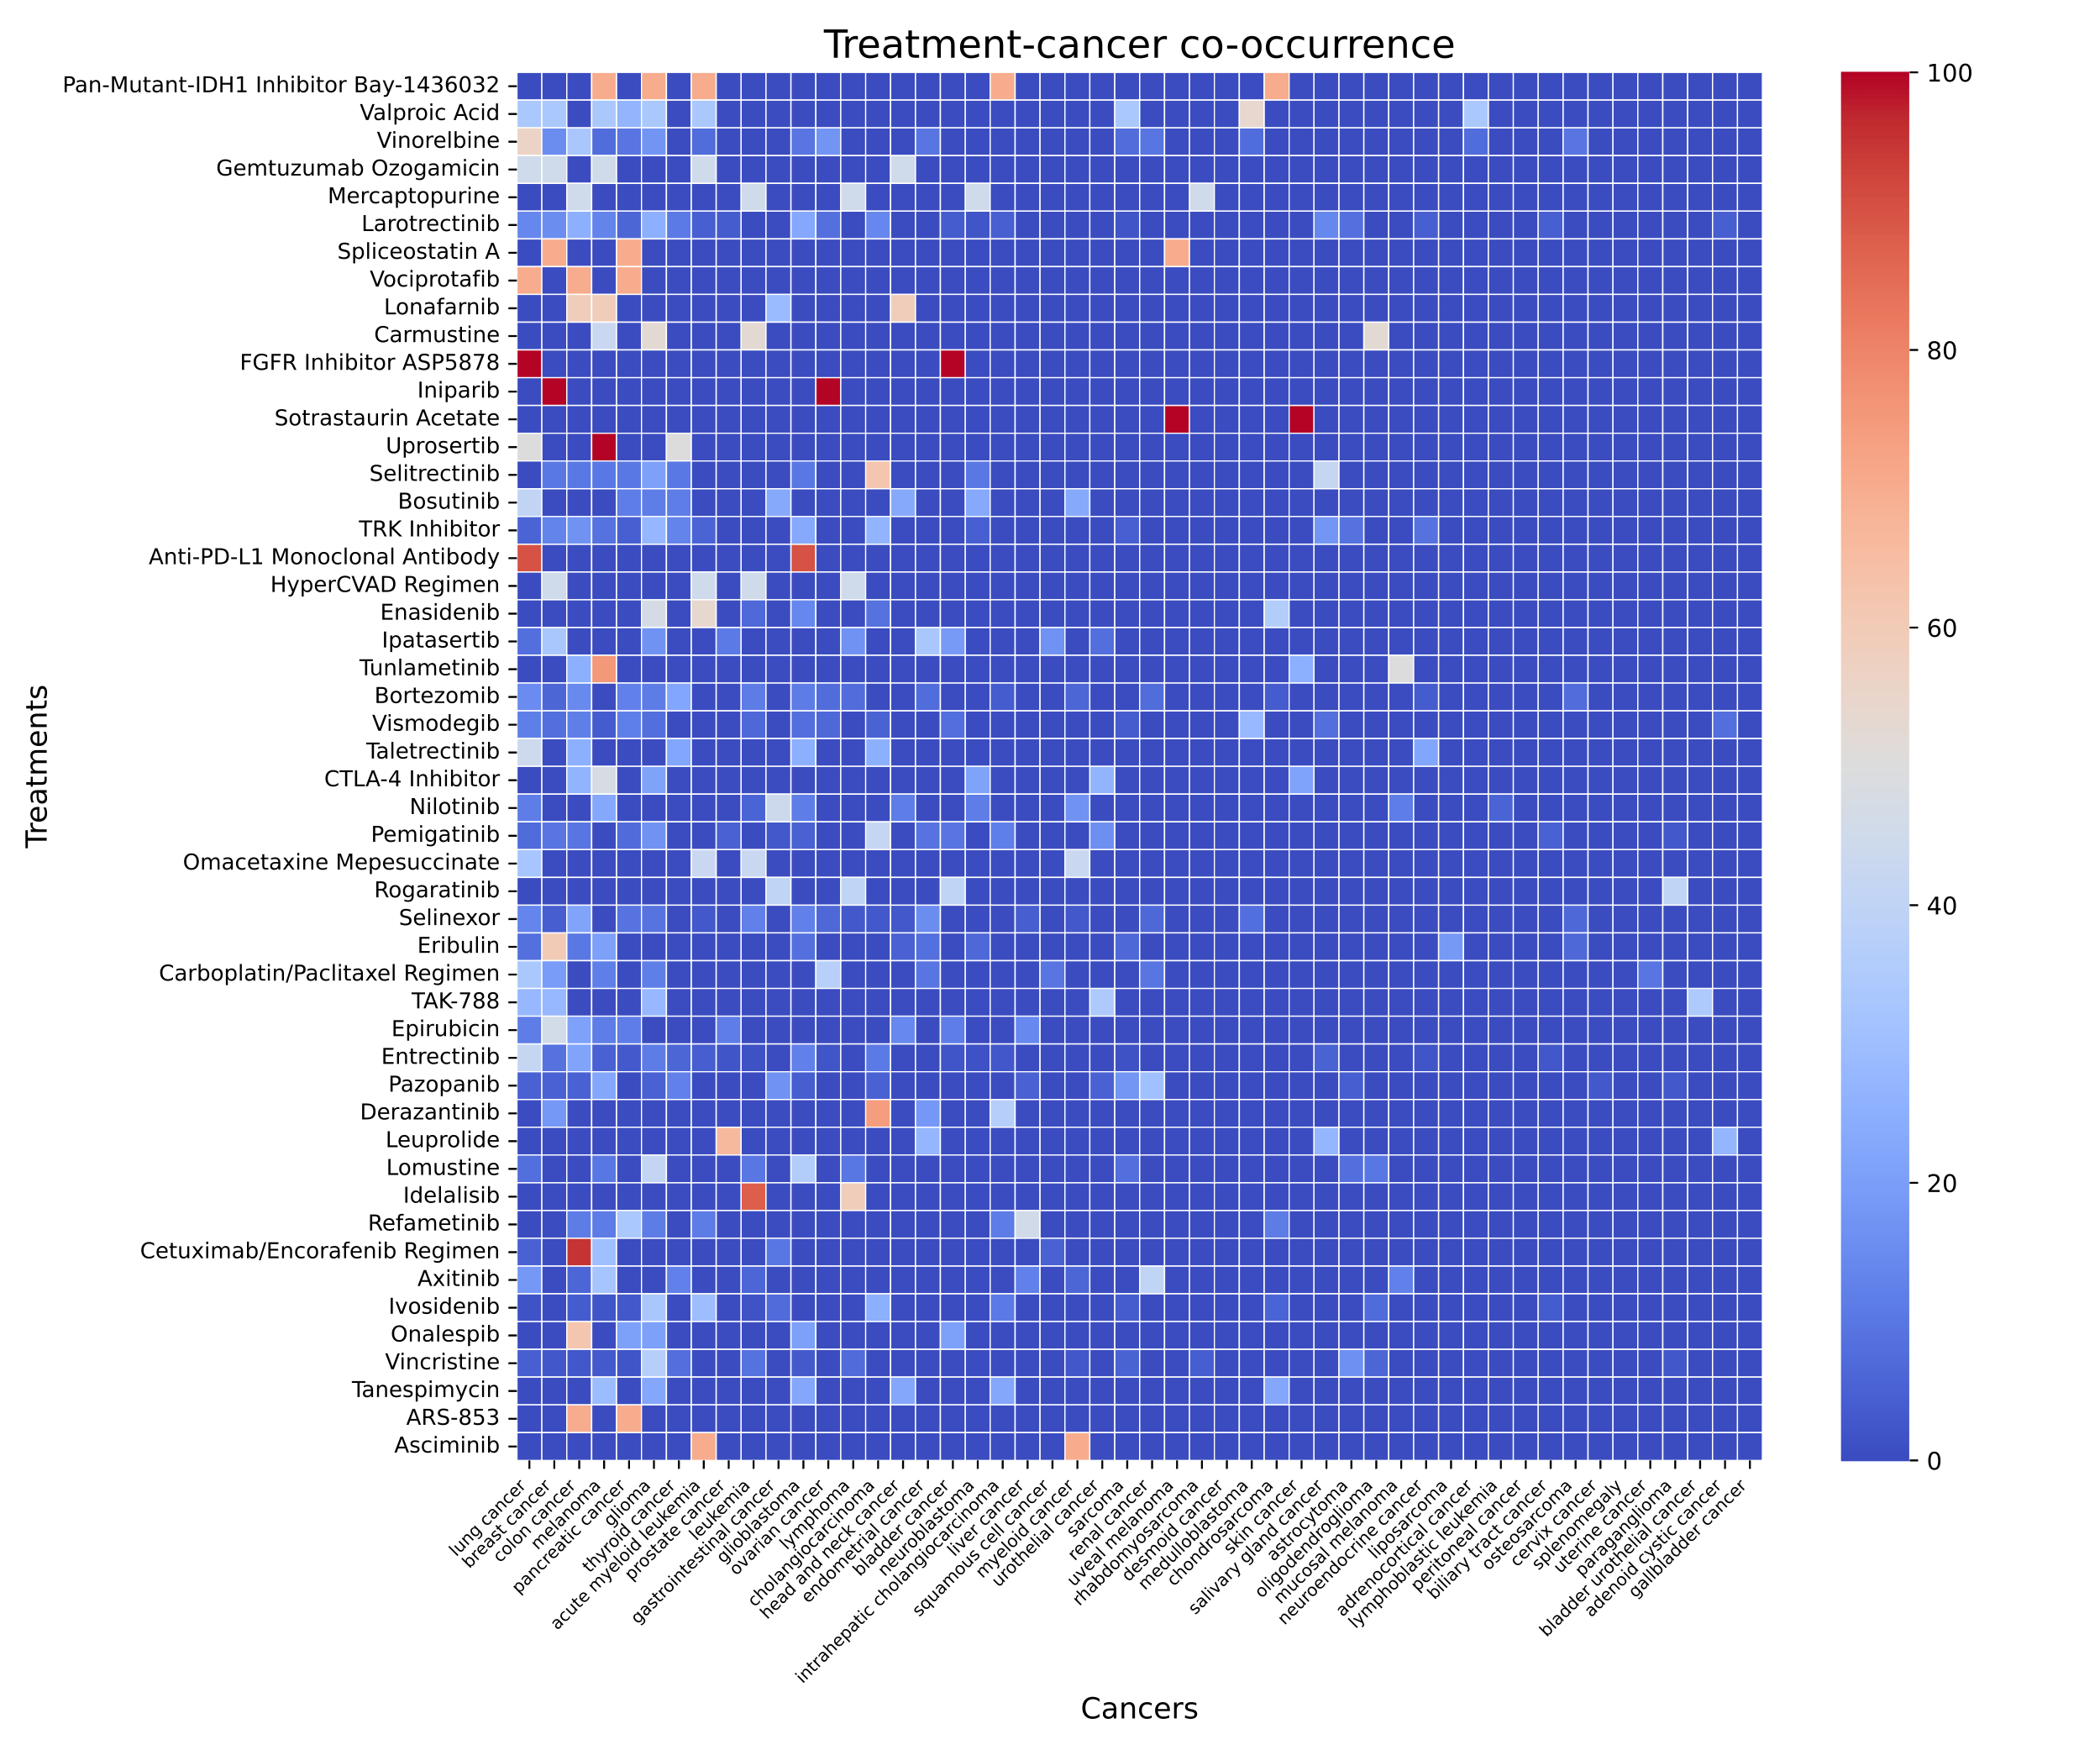
**
